# Functional harmonics reveal multi-dimensional basis functions underlying cortical organization

Katharina Glomb<sup>1,\*</sup>, Morten L. Kringelbach<sup>2,3</sup>, Gustavo Deco<sup>4,5,6,7</sup>, Patric Hagmann<sup>1</sup>, Joel Pearson<sup>8</sup>, and Selen Atasoy<sup>2,3</sup>

<sup>1</sup>Department of Radiology, Lausanne University Hospital and University of Lausanne (CHUV-UNIL), Lausanne, Switzerland

<sup>2</sup>Department of Psychiatry, University of Oxford, Oxford, United Kingdom

<sup>3</sup>Center of Music in the Brain (MIB), Clinical Medicine, Aarhus University

<sup>4</sup>Center of Brain and Cognition, Universitat Pompeu Fabra, Barcelona, Spain

<sup>5</sup>ICREA, Institució Catalana de Recerca i Estudis Avancats (ICREA), Spain

<sup>6</sup>Department of Neuropsychology, Max Planck Institute for Human Cognitive and Brain Sciences, Leipzig, Germany

<sup>7</sup>School of Psychological Sciences, Monash University, Melbourne, Australia

<sup>8</sup>School of Psychology, University of New South Wales, Sydney Australia

\*katharina.glomb@gmail.com

## ABSTRACT

The human brain consists of functionally specialized areas, which flexibly interact and integrate forming a multitude of complex functional networks. The principles underlying this functional differentiation and integration remain unknown. Here, we demonstrate that a fundamental principle ubiquitous in nature - harmonic modes - explains the orchestration of the brain's functional organization. Applied to the functional connectivity in resting state averaged across 812 participants, harmonic modes give rise to *functional harmonics* revealing the communication channels of the human brain. Remarkably, the isolines of the continuous functional harmonic patterns (gradients) overlap with the borders of cortical areas. Furthermore, each associated with a different spatial frequency, the functional harmonics provide the frequency-ordered building blocks to reconstruct any pattern of brain activity. We show that 47 brain activation patterns elicited by 7 different task categories in the Human Connectome Project task battery can be reconstructed from a very small subset of functional harmonics, uncovering a parsimonious description of the previously unknown relationship between task and resting state brain activity. Crucially, functional harmonics outperform other well-known basis functions such as those used in principle component analysis (PCA) or independent component analysis (ICA) in both, reconstructing the task activation maps as well as explaining the emergence of functionally specialized regions. Thus, our findings not only unify two competing views of the brain's functional organization, i.e. modular vs gradiental perspective, by revealing that the functional specialization of the human cortex occurs in a gradiental manner across multiple dimensions in the functional harmonic basis, but also evidence that this basis underlies task-elicited human brain function.

## Introduction

The human brain is topographically organized into functionally specialized brain areas<sup>1</sup>. Integration of these areas in various different constellations allows for the immense complexity of human brain function<sup>2</sup>. Despite remarkable progress in mapping the brain into functionally meaningful subdivisions, known as cortical areas<sup>3,4</sup>, and in identifying functionally relevant combinations of these areas forming the functional networks of the brain<sup>5</sup>, the principles governing this functional segregation and integration in the human brain have remained unknown. Here we demonstrate that a fundamental principle ubiquitous in nature, i.e. harmonic modes, when applied to functional connectivity data in humans, reveals both, the brain's functional networks as well as its topographic organization.

The topographic organization of the brain into functionally specialized areas is one of its fundamental properties, observed in evolution as early as the last common ancestor of vertebrates<sup>4,6</sup>. The individuality of each brain area is determined by its functional specification, its microstructure (cyto- and myeloarchitecture)<sup>4</sup>, and its inter- and intra-area connectivity<sup>3</sup>. Significant effort in neuroscience has been directed towards subdividing the brain into adjoining parcels, which are assumed to have uniform functional specification and homogeneous connectivity<sup>3,4</sup>. A multitude of functionally distinct brain areas coordinate through synchronous fluctuations in their activity<sup>7</sup>. Coherent oscillations among distinct brain areas have been shown to be another evolutionarily conserved aspect of brain activity<sup>8</sup>. The overlap of the networks formed through these spontaneous

system oscillations, termed the functional connectivity patterns, with the functional networks of the human brain identified by various sensory, motor, and cognitive task paradigms<sup>9-12</sup>, strongly indicates their relevance for the brain's functionality.

However, this modular view of brain organization, where separate, adjoining brain areas with uniform functionality and homogeneous structural connectivity integrate into functional networks through coherent oscillations, has been challenged by the presence of gradually varying boundaries between brain areas suggesting a degree of transition instead of sharply separated brain areas<sup>13</sup>, as well as by the existence of topographic mappings, which characterize the differences within a functionally specific brain area<sup>14-16</sup>. Topographic mappings including retinotopy<sup>14</sup>, somatotopy<sup>15</sup>, tonotopy<sup>16</sup>, show that representation of our visual field, body and auditory frequency spectrum are spatially continuously represented across the areas of the primary visual, somatomotor and auditory cortices, respectively, challenging the assumption of uniform functionality within the determined brain areas and demonstrating a smoothly varying functionality<sup>13</sup>. As an alternative, theoretical work<sup>17,18</sup> and recent experimental findings<sup>13</sup> suggested a "gradiental perspective", where the functional organization of the cortex is argued to be continuous, interactive and emergent as opposed to mosaic, modular and prededicated<sup>17</sup>. Similar to the smoothly varying functionality of primary sensory and motor areas, association cortices functioning as integration centres for more complex or elaborated mental processes are hypothesized to emerge from the convergence of information across sensory modalities<sup>18</sup> with increasing spatial distance on the cortex from the highly functionally specialized primary cortices<sup>19</sup>. Supporting this hypothesis, a principal connectivity gradient of cortical organization in the human connectome has been identified, where the functional networks of the human brain are located according to a functional spectrum from perception and action to more abstract cognitive functions<sup>13</sup>. Although converging evidence<sup>13,20,21</sup> supports the continuous and emergent view of cortical organization, the principles underlying the functional organization in the brain remain largely unknown.

Here, we demonstrate that the functional segregation and integration in the brain are governed by the same natural principle of harmonic modes that underlies a multitude of physical and biological phenomena including the emergence of harmonic waves (modes) encountered in acoustics<sup>22</sup>, optics<sup>23</sup>, electron orbits<sup>24,25</sup>, electro-magnetism<sup>26,27</sup> and morphogenesis<sup>28,29</sup>. By solving the time-independent (standing) wave equation<sup>30,31</sup> on the functional connectivity (FC) structure of the human brain, we uncover the spatial shapes of the harmonic modes emerging from synchronous hemodynamic fluctuations in large scale brain activity as measured with functional magnetic brain imaging (fMRI). These harmonic modes decompose the functional connectivity into a hierarchical set of (spatial) frequency-specific communication channels, which naturally emerge from coherent, spontaneous brain activity, and unveil both, the principal connectivity gradient<sup>13</sup>, as well as cortical parcellations<sup>3</sup>. Our results indicate that the functional segregation and integration in the brain are governed by a multi-dimensional harmonic representation that we call "functional harmonics". Finally, the decomposition of the brain activity maps elicited by various cognitive tasks into the set of functional harmonics reveals that each task primarily involves activation of a very small subset of functional harmonics, suggesting that the functional harmonics reveal fundamental building blocks of not only resting state activity, but also various cognitive functions.

## Estimation of functional harmonics

Mathematically, the patterns of harmonic modes of a dynamical system are estimated by the eigendecomposition of the Laplace operator, which lies at the heart of theories of heat, light, sound, electricity, magnetism, gravitation and fluid mechanics<sup>32</sup>. In vibrating systems, eigenfunctions of the Laplacian constitute standing waves, which also have been proposed as the mechanism underlying cortical communication observed in electroencephalogram (EEG) data<sup>33</sup>. Theoretical studies as well as experimental findings have shown that spherical harmonics, i.e. Laplace eigenfunctions on a sphere, underlie cortical activation patterns in fMRI<sup>34</sup>. Harmonic modes of the structural connectivity of the human brain, i.e. Laplace eigenfunctions on the human connectome, have been found to predict the collective dynamics of cortical activity at the macroscopic scale, and reveal resting state networks<sup>31</sup>.

In this work, we hypothesized that the harmonic modes of the brain's communication structure given by its *functional* connectivity underlie its functional integration and segregation. There are several crucial properties of harmonic modes that led us to form our hypothesis:

- 1) The dense functional connectivity (dense FC) matrix, in our study estimated from the pairwise temporal correlations between all pairs of vertices on the cortical surface (59,412 vertices in total), encodes the communication structure of the human brain. In order to find a multi-dimensional representation that best preserves this functional communication structure, we utilized the discrete counterpart of the harmonic modes defined on a graph, i.e. the eigenvectors of the graph Laplacian, which have been shown to optimally preserve the local graph structure while embedding it into a lower-dimensional space<sup>35</sup>. Hence, the functional harmonics estimated by the harmonic modes of the dense FC in this work, reveal the optimal multi-dimensional mapping between the communication structure of the brain given by the dense FC and the cortical surface in the sense that the strongest functional relationships given by the largest correlation values are optimally preserved.

- 2) Functional harmonics are the smoothest patterns that respect the constraints posed by the functional relationships given by the FC<sup>35</sup>. This implies that the average difference between neighbouring nodes in a graph representation is minimized.

86 Intriguingly, theoretical work has shown that activation patterns on graphs in which neighbouring nodes co-activate lead to  
87 patterns with minimum free energy or entropy<sup>36,37</sup>, and that the transition between such patterns requires minimal energy<sup>38</sup>.

88 3) Due to their orthogonality, Laplace eigenfunctions provide a new function basis. When applied to a one-dimensional  
89 domain with cyclic boundary conditions, i.e. to a circle, Laplace eigenfunctions constitute the well-known Fourier basis, whereas  
90 on a sphere, they yield the spherical harmonics. Each eigenfunction corresponds to a unique eigenvalue related to its spatial  
91 frequency, and the set of all eigenfunctions forms a function basis, in which any signal can be represented in the frequency  
92 domain. Considering this particular aspect of harmonic patterns, functional harmonics provide a new frequency-specific  
93 function basis driven by the brain's communication structure (dense FC), where each dimension provides a frequency-specific  
94 communication channel on the cortex.

95 4) The eigenfunctions of the Laplacian explain self-organizing patterns in many dynamical systems<sup>24-26,28,39</sup>, ranging  
96 from relatively simple physical phenomena like vibrating strings and metal plates<sup>22</sup> to complex biological processes such as  
97 biological pattern formation and morphogenesis<sup>28,29</sup>.

98 Considering that functional harmonics provide an optimal, frequency-specific mapping of the brain's communication  
99 structure to the cortex; that they represent the most energy-efficient activation patterns which respect the constraints posed  
100 by this communication structure; and given the ubiquity of harmonics in nature, we hypothesized that functional harmonics  
101 provide the ideal candidate to explain functional segregation and integration in the brain. In order to test this hypothesis, we  
102 used the dense FC computed from resting state fMRI data averaged across 812 subjects, provided by the Human Connectome  
103 Project (HCP) 900 subjects data release<sup>40-47</sup>. We obtained the functional harmonics by estimating the eigenvectors of the graph  
104 Laplacian computed on the graph representation of the FC (Figure 1). We compared our results to five alternative function bases.  
105 In order to test the effect of each step in our processing pipeline, we compared the performance of the functional harmonics  
106 first to that of the eigenvectors of the dense FC matrix (Figure 1c, SI Figure 5); second to the eigenvectors of the adjacency  
107 matrix (SI Figure 4), which is obtained after thresholding and binarizing the dense FC matrix, and which encodes the graph of  
108 the brain's communication structure (Figure 1d); and third to a surrogate harmonic basis created by applying spherical rotations  
109 to the functional harmonics<sup>48</sup> (SI Figure 8 for an example). Furthermore, to relate the performance of functional harmonics to  
110 other well-known function bases, we also performed comparisons to the basis functions of PCA (SI Figure 6) and ICA (SI  
111 Figure 7).

## 112 Functional harmonics reveal functionally relevant communication channels

113 We first investigated whether functional harmonics yield functionally meaningful communication channels, i.e. patterns of  
114 correlated activity. Figure 2 shows the first 11 non-constant functional harmonics (referred to as  $[\psi_1, \psi_2, \dots, \psi_{11}]$ ), ordered  
115 starting from the lowest eigenvalue, illustrating that each harmonic is a smoothly varying pattern on the cortex between a  
116 positive and a negative polarity; i.e., a gradient. There is an intrinsic relation between the Laplace eigenvalues and the spatial  
117 frequency/wavelength; namely as the eigenvalue increases, spatial frequency also increases, while the spatial wavelength  
118 decreases. Hence with increasing eigenvalue, the functional harmonics become increasingly more complex and segregate the  
119 cortex into an increasing number of nodal areas<sup>30</sup> (contiguous areas of the cortex with similar colors in the surface plots in  
120 Figure 2). This means that functional harmonics yield not only a multi-dimensional, but a *multiscale* description of the cortex.  
121 Note that the ordering by the wavelength/frequency is a property that emerges from the Laplacian and therefore only applies to  
122 the functional harmonics themselves and, by definition, their rotations; whereas other function bases used as controls in this  
123 study, shown in SI Figures 4-7, are not ordered by wavelength (or equivalently wavenumber) and thus do not implicitly possess  
124 this multiscale property.

125 As shown in Figure 2, functional harmonic resemble known functional systems and brain areas. In order to test the degree  
126 of this correspondence, we quantified the overall overlap between functional harmonic patterns and the brain regions (parcels)  
127 delineated by the HCP parcellation<sup>3</sup>. To this end, for each of the functional harmonics shown in Figure 2, we compared the  
128 within- and between-area-variability of each cortical region, where a large difference between the within- and between-area  
129 variability, indexed by a large silhouette value, indicates that that particular region is well-separated from the rest of the cortex<sup>49</sup>.  
130 We compared the resulting values to those obtained from spherical rotations of the functional harmonics, in which we rotated  
131 the functional harmonic patterns on a spherical version of the cortical surface<sup>48</sup> (see SI Figure 8 for an example). This control  
132 still yields smooth, symmetrical harmonic patterns on the cortex, but they do not emerge from the communication structure (FC  
133 matrix) of the brain and are not necessarily orthonormal. Furthermore, we repeated this analysis for the other four function  
134 bases (FC eigenvectors, adjacency eigenvectors, PCA and ICA), using spherical rotations of these basis functions. As shown  
135 in Figure 3a, we found an alignment between the isolines of the functional harmonics and parcel borders for each of the  
136 first 11 functional harmonics, as verified by significantly larger silhouette values for functional harmonics compared to the  
137 rotated harmonic basis ( $p_{\text{corr}} < 0.05$  after Bonferroni correction, Monte Carlo tests; see Online Methods for details). The only  
138 exception to this alignment was functional harmonic 4 ( $\psi_4$ ), which captures the retinotopic organization of early visual regions  
139 (see below for a discussion of retinotopic organization of functional harmonics). Importantly, this was not the case for any of

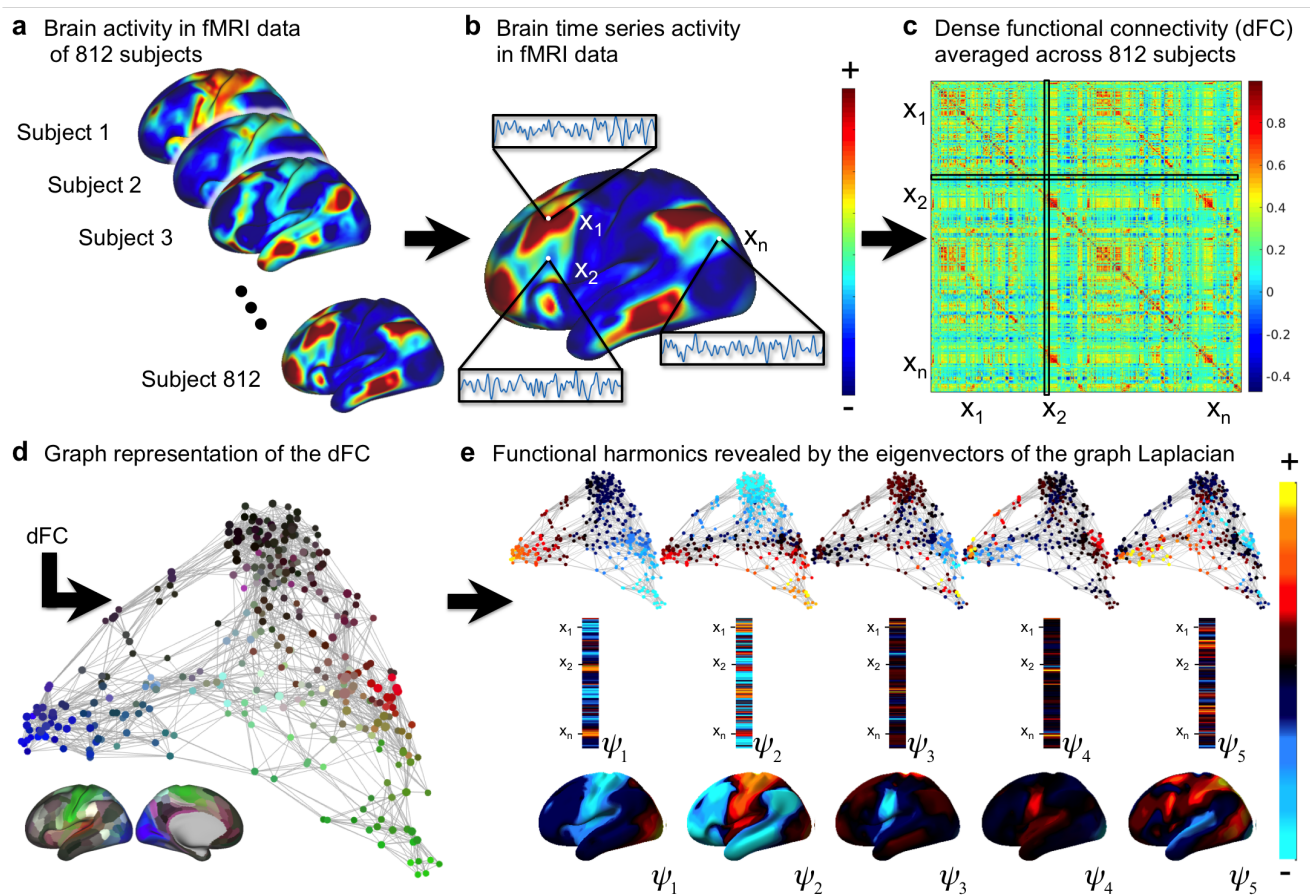

**Figure 1.** Workflow for the estimation of functional harmonics. a: Brain activity measured with functional magnetic resonance imaging (fMRI) in resting state for 812 subjects provided by the Human Connectome Project (HCP, 900 subjects data release).<sup>40–47</sup> b: Illustration of brain time series activity of three representative vertices on the cortex ( $x_1, x_2, \dots, x_n$ ). c: The dense functional connectivity (FC) matrix computed from the temporal correlations between the time courses of each pair of vertices as shown in b averaged across 812 subjects. d: Representation of the dense FC as a graph, where the edges indicate strong correlations between the corresponding vertices. The anatomical location of the vertices are colour-coded<sup>3</sup>. e: Functional harmonics are estimated by the eigenvectors of the graph Laplacian computed on the graph representation of the FC. The first five functional harmonics ordered from the lowest to higher spatial frequencies are illustrated on the FC graph representation (top), in the eigenvector format as  $59412 \times 1$  dimensional vectors (middle) and on the cortical surface (bottom). For illustrative purposes, the graph representations are shown for a parcellated version of the FC matrix using the HCP parcellation<sup>3</sup> in d and e. We note that the computation of the functional harmonics have been performed on the dense FC using  $59412 \times 59412$  without using any parcellation.

140 the control function bases, where in each case at least some of the first 11 basis functions and their rotations performed equally  
 141 well (Figure 3b-e). For qualitative evaluation, the overlap between parcels and functional harmonics as well as other bases is  
 142 shown in SI Figures 3-7.

143 In the following, we provide some insight into the functional significance of each of the functional harmonics shown in  
 144 Figure 2. Functional harmonics 1 ( $\psi_1$ ) and 2 ( $\psi_2$ ) correspond to previously identified large-scale gradients<sup>13</sup> that delineate  
 145 the separation between the major sensory and the uni- vs. multimodal cortices in the brain, respectively (see SI Figure 1a).  
 146 Figure 2a and b demonstrate the overlap between the visual and sensorimotor networks as defined in Yeo et al. (2011)<sup>50</sup> and the  
 147 gradiental patterns of the first and second functional harmonics. We observed that functional harmonic 3 ( $\psi_3$ ) reveals a finer  
 148 subdivision of the somatosensory/motor system<sup>51–53</sup>. The overlay of the borders of the five somatotopic areas defined by the  
 149 HCP<sup>3,54</sup> on the third functional harmonic are shown in Figure 2c. Similarly, in functional harmonic 4 ( $\psi_4$ ), we found a finer  
 150 segregation of the visual system, following a retinotopic eccentricity gradient (for further details on retinotopic mapping see the  
 151 following section)<sup>55</sup>. The overlay of the borders of early visual areas (V1-V4) on functional harmonic 4 ( $\psi_4$ ) are shown in  
 152 Figure 2d.

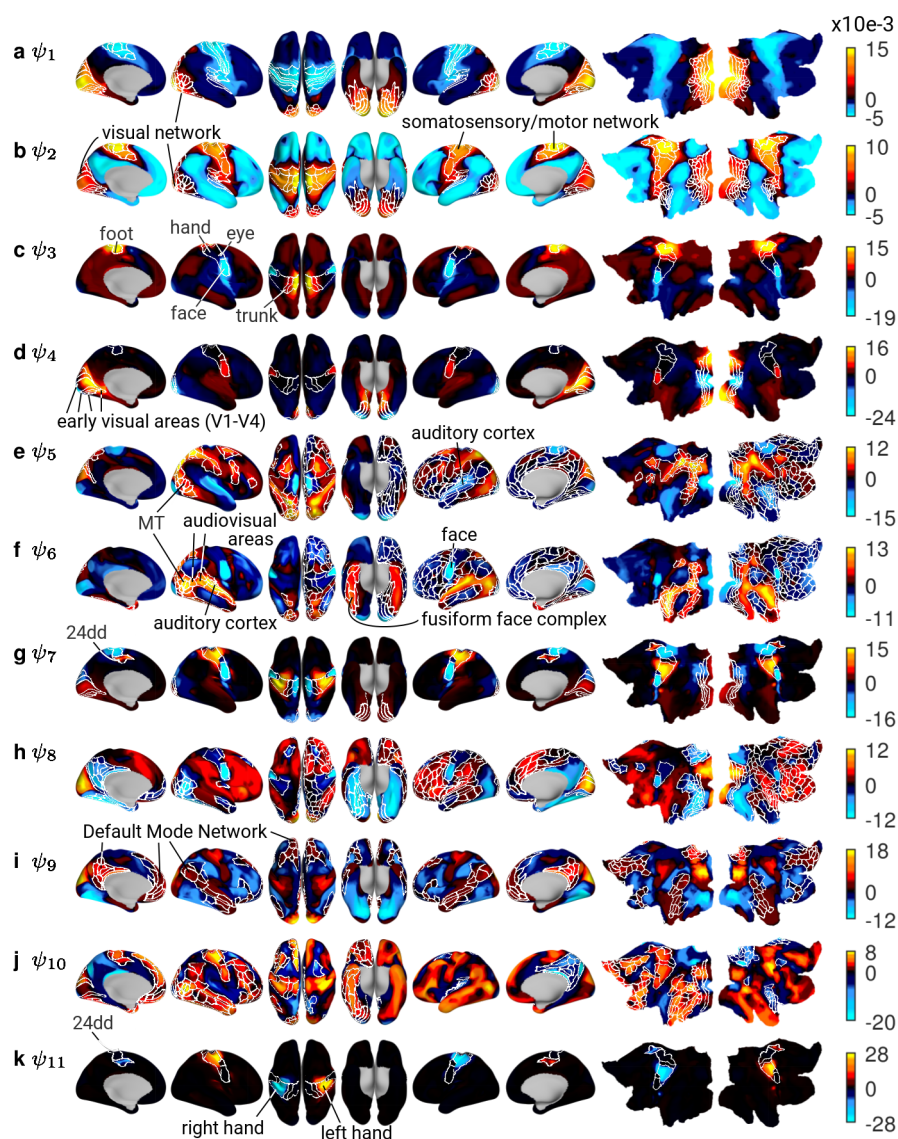

**Figure 2.** a-k: The first 11 non-constant harmonics plotted on the cortical surface. White lines show borders of HCP parcels. V1-V4: visual areas 1 to 4; MT: middle temporal visual area; 24dd: an area that contains a higher order representation of the hand; fusiform face complex: an area that responds specifically to images of human faces.

153 The regions found in the positive polarity of functional harmonic 5 ( $\psi_5$ ) (borders shown on the left 3 panels in Figure 2e)  
 154 closely resemble the sensory-motor pathway<sup>50</sup> (Figure 2e), and are known to be modulated by visuospatial attention<sup>56</sup>. In  
 155 the negative polarity, we found the auditory cortex and parts of the somatosensory/motor network (Figure 2e). In contrast, in  
 156 functional harmonic 6 ( $\psi_6$ ), auditory and visual areas were both localized in the positive polarity, forming a network related to  
 157 audiovisual object (including faces) recognition<sup>57-59</sup>, i.e. recognition of the "outer world". The negative polarity of functional  
 158 harmonic 6 ( $\psi_6$ ) segregates the somatotopic face area as well as parts of the default mode network (DMN), a network of regions  
 159 whose activity has been related to self-referential tasks<sup>60</sup>. Thus, the negative polarity of functional harmonic 6 ( $\psi_6$ ) forms a  
 160 self-referential processing stream<sup>60-62</sup>. Functional harmonic 7 ( $\psi_7$ ) provides a further somatotopic gradient, including a higher  
 161 hand area, 24dd, in the medial cortex<sup>51</sup> (see Figure 2g and annotations in Figure 2c). Functional harmonics 8 to 10 ( $\psi_8, \psi_9, \psi_{10}$ )  
 162 correspond to different subdivisions of higher order networks such as the frontoparietal network and DMN (see SI Figure 2). In  
 163 particular, the DMN<sup>63</sup> is delineated in the positive polarity of functional harmonic 9 ( $\psi_9$ ) (borders of the DMN as defined by  
 164 Yeo et al. (2011)<sup>50</sup> are overlaid on functional harmonic 9 ( $\psi_9$ ) in Figure 2i). Functional harmonic 11 ( $\psi_{11}$ ), the first asymmetric  
 165 harmonic between the two hemispheres, yields the separation between the right and left somatotopic hand areas<sup>64</sup>. Overall,  
 166 these results demonstrate that functional harmonics provide a multitude of functionally relevant communication channels, each

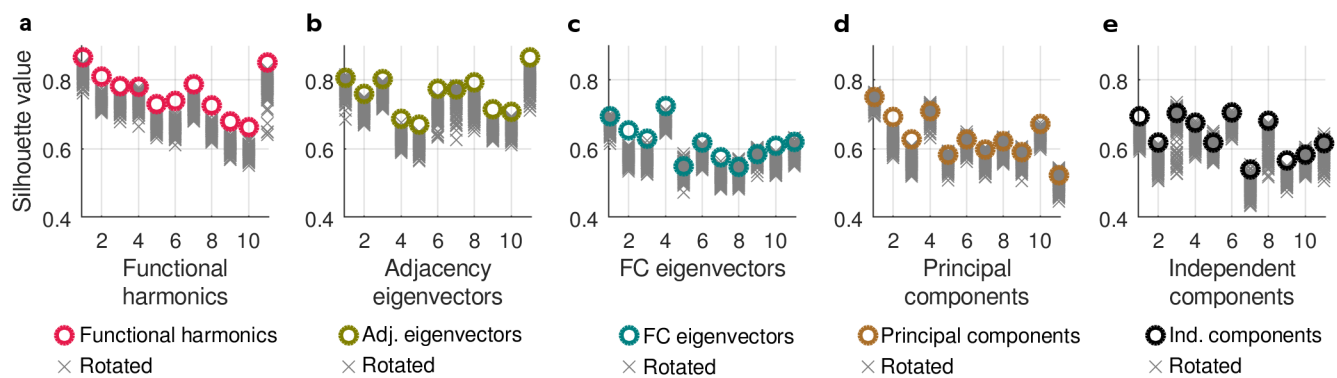

**Figure 3.** a-e: Silhouette values quantifying the degree to which isolines of the functional harmonics as well as control basis sets (colored circles) and their rotations (grey crosses) follow the borders of the HCP parcellation. The silhouette value lies between -1 if all vertices were to be assigned to the wrong parcel, and 1 if all vertices were to be assigned to the correct parcel. For each basis function set, 220 rotations were computed.

167 associated with a unique spatial frequency, and enable a set of parallel processing streams in the human brain.

## 168 Functional harmonics reveal brain areas and topographic mappings

169 The fact that functional harmonics display both, well-delineated specialized regions; e.g. in functional harmonics 3 ( $\psi_3$ ), 7  
 170 ( $\psi_7$ ), and 11 ( $\psi_{11}$ ), also evident by the large silhouette values mentioned in the previous section, as well as gradients that  
 171 integrate brain regions from different functional systems; e.g. in functional harmonics 5 ( $\psi_5$ ) and 6 ( $\psi_6$ ), led us to hypothesize  
 172 that functional harmonics provide a unifying explanation for two seemingly opposing perspectives of cortical organization: the  
 173 gradiental perspective arguing that cortical organization is continuous on the one hand and the modular perspective stating that  
 174 brain function emerges from modular organization of specialized brain regions on the other. We therefore explicitly tested  
 175 whether functional harmonics fulfill the constraints posed by both of these views.

176 In addition to the parcels delineated in the HCP parcellation<sup>3</sup>, we investigated whether functional harmonics also capture  
 177 somatotopy<sup>15</sup> and retinotopy<sup>14</sup>, two major topographic mappings found in the brain. Topographic mappings represent sensory  
 178 input on the cortical surface such that the relative positions of the receptors, which receive these inputs, are preserved. Five  
 179 somatotopic sub-areas (in each hemisphere) as defined by the HCP<sup>3</sup> form a topographic map of the surface of the body on the  
 180 cortex, i.e., the face, hands, eyes, feet, and trunk.

181 To quantify the degree to which each somatotopic sub-area is delineated within functional harmonics 3 ( $\psi_3$ ), 7 ( $\psi_7$ ), and  
 182 11 ( $\psi_{11}$ ), we again utilized the within- and between-area-variability as above, but applied this measure specifically to the 10  
 183 somatotopic sub-areas (see SI Figure 9). We measured their separation both from the rest of the brain as well as from other  
 184 somatotopic areas. We found that for each of the tested functional harmonics, at least one somatotopic region is significantly  
 185 separated ( $p_{\text{corr}} < 0.05$  after Bonferroni correction, Monte Carlo tests with 300 permutations). This finding indicates that  
 186 functional harmonics capture somatotopic organization in the cortex. Figure 4a illustrates the two-dimensional subspace formed  
 187 by functional harmonics 3 ( $\psi_3$ ), and 11 ( $\psi_{11}$ ), which strikingly accounts for the precise mapping of the human  
 188 body onto the somatotopic regions of the cortex (see SI Figure 1b-d for further examples).

189 We next investigated the presence of retinotopic mapping of early visual regions (V1-V4), where cortical representations of  
 190 the visual field reflect the positions of the receptors such that each vertex within the patterns of functional harmonics is assigned  
 191 an eccentricity (distance from the fovea) and an angle (top, bottom, left, right).<sup>55</sup> To investigate the degree of agreement  
 192 between the functional harmonics and the retinotopic mappings, we measured the correlation between eccentricity as well  
 193 as polar angle maps and the functional harmonic patterns in V1-V4. We found significant correlations ( $p_{\text{corr}} < 0.05$  after  
 194 Bonferroni correction) between the retinotopic eccentricity map and all harmonics except functional harmonic 9 ( $\psi_9$ ); and  
 195 between the retinotopic angular map and harmonics 1-4 ( $\psi_1, \dots, \psi_4$ ), 7-9 ( $\psi_7, \dots, \psi_9$ ), and 11 ( $\psi_{11}$ ). Examples of polar plots  
 196 of the retinotopic gradients are shown in Figure 4c, d (all polar plots are shown in SI Figure 10).

197 Besides the two major topographic mappings of the cortex, we observed that functional harmonic 10 ( $\psi_{10}$ ) captures the  
 198 hierarchical organization of the auditory system. To quantify this agreement, we measured the correlation between the spatial  
 199 pattern of functional harmonic 10 ( $\psi_{10}$ ) and the extent to which each area is associated with the auditory network in the resting  
 200 state (degree of auditory involvement)<sup>3</sup>. We found a significant correlation ( $r = -0.63$ ,  $p = 4 \cdot 10^{-21}$ ) between functional  
 201 harmonic 10 ( $\psi_{10}$ ) and the degree of auditory involvement of the functional areas (Figure 4b).

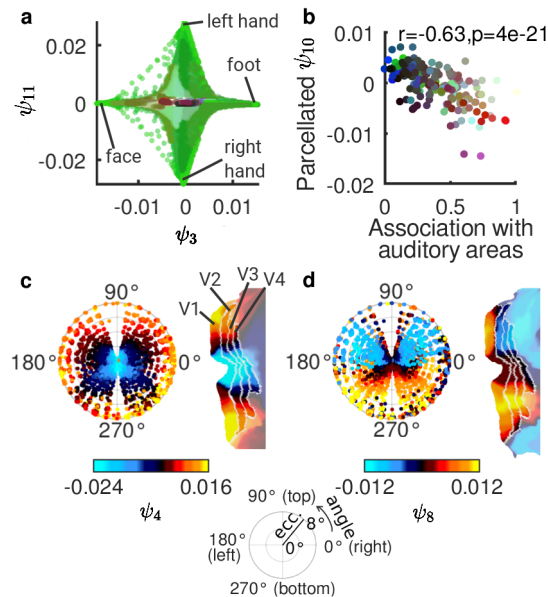

**Figure 4.** a: Functional harmonics 3 ( $\psi_3$ ) and 11 ( $\psi_{11}$ ) in their own space. The location of 4 somatotopic areas in this space is annotated. b: Correlation between the degree to which areas are related to auditory regions<sup>3</sup> and the value of functional harmonic 10 ( $\psi_{10}$ ), averaged within each of the 360 parcels. The color code is taken from the parcellation in Glasser et al. (2016)<sup>3</sup>, see also figure 1d. c and d: Retinotopies of functional harmonics 4 (c;  $\psi_4$ ) and 8 (d;  $\psi_8$ ). Each panel shows, on the left, the colors of the respective functional harmonic in early visual areas V1-V4 on a polar plot of eccentricity (distance in degree from the fovea) and angle on the visual field (see legend at the bottom of the figure). On the right, the respective functional harmonic is shown on a flat map of early visual cortex (left hemisphere). V1, V2, V3, V4: visual areas 1, 2, 3, 4.

## 202 Functional harmonics are basis functions of human cognition

203 Considering the parallel between functional harmonics and the well-known Fourier basis, i.e. the fact that they both are defined  
 204 as Laplacian eigenfunctions, the former applied to a one-dimensional domain with cyclic boundary conditions (a circle) and the  
 205 latter to the communication structure of the human brain (dense FC matrix), functional harmonics provide an extension of the  
 206 Fourier basis to the communication structure of the human brain. As such, they provide per definition a frequency-specific  
 207 function basis, in which any pattern of brain activity can be represented as a weighted combination of functional harmonics.  
 208 Given the experimental evidence showing that resting state functional connectivity reflects connectivity during task<sup>9-12</sup>, we  
 209 hypothesized that functional harmonics provide building blocks of task activity measured on the cortex. In order to test this  
 210 hypothesis, we reconstructed 47 group-level task maps provided by the HCP<sup>54</sup> from the functional harmonics (see Online  
 211 Methods). The 47 maps consist of activation maps as well as contrasts derived from 7 groups of tasks (working memory, motor,  
 212 gambling, language, social, emotional, relational - see Online Methods for summaries). The functional harmonic reconstruction  
 213 yields a coefficient (weight) for each functional harmonic, quantifying how much it contributes to a certain task map. The set of  
 214 all coefficients forms a spectrum equivalent to the power spectrum obtained from a Fourier transform, in this case the power  
 215 spectrum of the functional harmonic basis.

216 We first tested whether it is possible to approximate task maps as superpositions of subsets of functional harmonics, linearly  
 217 combining them in the order of their eigenvalues. We quantified the goodness of fit by measuring the distance between the  
 218 original and the reconstructed task maps. Figure 5a-g shows the average normalized reconstruction errors for all groups of tasks  
 219 and for all function bases: for the functional harmonic basis (red line), the error drops from about 1.00 to about 0.5 when using  
 220 only the first 11 functional harmonics shown in Figure 2, corresponding to 0.02% of the total functional harmonic spectrum.  
 221 This corresponds to a level of correlation of around 0.7 between the original and reconstructed task maps (see SI Figure 11b).  
 222 Figure 5h illustrates the reconstruction procedure for one specific task (working memory: body; see also SI Figures 16-22).

223 We compared the performance of the first 11 non-constant functional harmonics in reconstructing task activation maps to  
 224 that of the control function bases (rotations of functional harmonics, eigenvectors of the adjacency matrix, eigenvectors of  
 225 the FC, principal components, and independent components; Figure 5a-g). We found that functional harmonics outperform  
 226 the rotated harmonic basis ( $p_{\text{corr}} < 0.005$ , Monte-Carlo tests with 1000 permutations, Bonferroni corrected for multiple  
 227 comparisons), adjacency eigenvectors ( $p_{\text{corr}} < 0.005$ , Monte-Carlo tests with 1000 permutations, Bonferroni corrected for

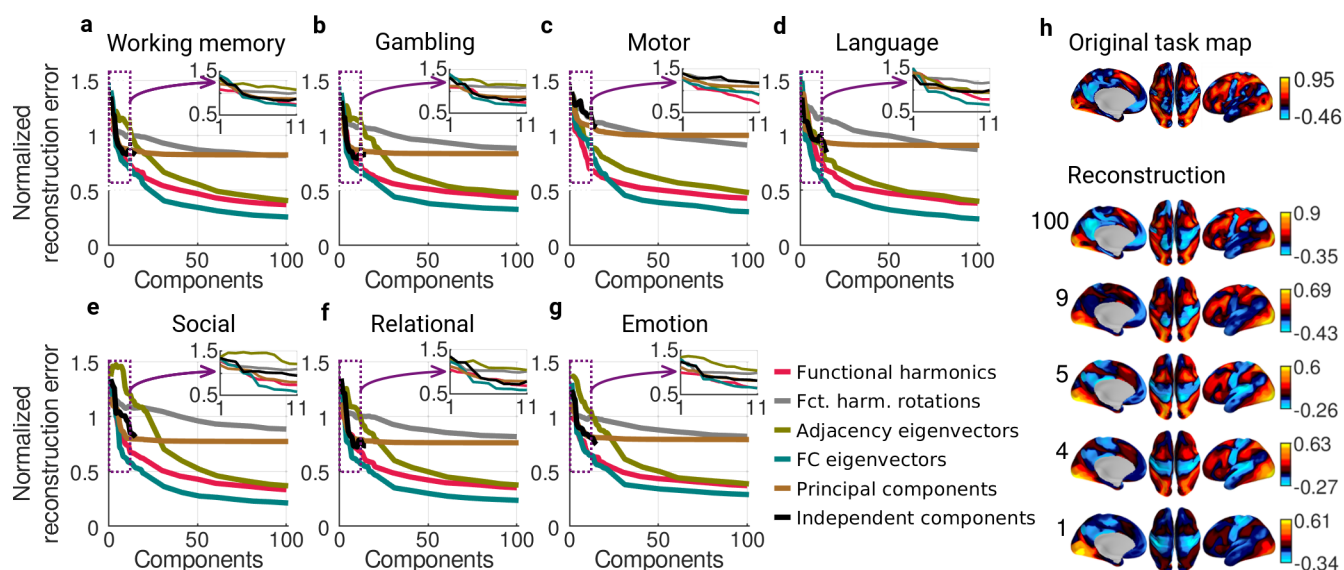

**Figure 5.** a-g: Mean reconstruction errors for each of the 7 task groups and all 6 basis function sets (see also SI Figures 11-15); h: One example for a reconstruction using a working memory task. The top panel is the original task activation map (working memory - body), and subsequent panels use the number of harmonics indicated on the left to reconstruct it.

multiple comparisons), as well as PCA ( $p_{\text{corr}} < 0.005$ , Monte-Carlo tests with 1000 permutations, Bonferroni corrected for multiple comparisons) and ICA ( $p_{\text{corr}} < 0.005$ , Monte-Carlo tests with 1000 permutations, Bonferroni corrected for multiple comparisons), and did not exhibit any significant difference to the performance of the FC eigenvectors ( $p > 0.15$  before correction for multiple comparisons, not significant (n.s.)).

In order to examine the reconstruction performance of each function basis for different task groups, we applied the same Monte-Carlo analysis to each of the 7 task categories separately. We found that reconstruction errors of functional harmonics were significantly lower than those of their rotations for each of the task groups (all  $p_{\text{corr}} < 0.035$ , Monte-Carlo tests with 1000 permutations, Bonferroni corrected for multiple comparisons), and significantly lower than those of the adjacency eigenvectors in six out of seven task groups (all  $p_{\text{corr}} < 0.035$ , Monte-Carlo tests with 1000 permutation, Bonferroni corrected for multiple comparisons, except language, where  $p = 0.18$ , before correction for multiple comparisons, n.s.). In comparison to FC eigenvectors, while there was no significant difference in the reconstruction performance when all tasks were pooled, we found that functional harmonics performed significantly better in the reconstruction of motor tasks ( $p_{\text{corr}} < 0.035$ , Monte-Carlo tests with 1000 permutations, Bonferroni corrected for multiple comparisons; see inset in Figure 3c). Compared to PCA and ICA, the reconstruction errors of functional harmonics were significantly lower for motor and working memory task groups (all  $p_{\text{corr}} < 0.035$ , Monte-Carlo tests with 1000 permutation, Bonferroni corrected for multiple comparisons), while for all other task groups there were no significant differences (all  $p > 0.01$  before correction for multiple comparisons, n.s.). These results indicate that functional harmonics delineate the functional systems involved in working memory and motor tasks more precisely than other function bases used as control. It is important to note that the number of tasks in the remaining categories is smaller (3 tasks per category) than that of the motor and working memory task groups, and more data may be required to achieve significant differences for these categories. In summary, when all individual task groups as well as the overall performance in reconstructing the complete task pool is considered, the functional harmonics outperform all 5 control function bases using only first 11 non-constant components.

Given that functional harmonics constitute functionally relevant communication channels, we hypothesized that the task activation maps can be characterized by their power spectrum. Figure 6a, d and Figure 6b, e, show two examples of task activation maps and the corresponding normalized power of the first 11 non-constant functional harmonics, respectively, revealing how strongly each of the 11 functional harmonics shown in Figure 2 contributes to these particular task maps. For qualitative evaluation, we display the task activation maps reconstructed by superimposing functional harmonics in the order of their contribution strength for varying numbers of functional harmonics in Figure 6c, f (see also SI Figures 16-22). Across all 47 task maps that were evaluated, the functional harmonic which was the strongest contributor was always either the constant functional harmonic or one of the first 11 non-constant harmonics shown in Figure 2.

In order to evaluate the uniqueness of the functional harmonic power spectrum of each task activation map, we computed the distance between a given reconstructed map and all original task maps, resulting in a confusion matrix for each number



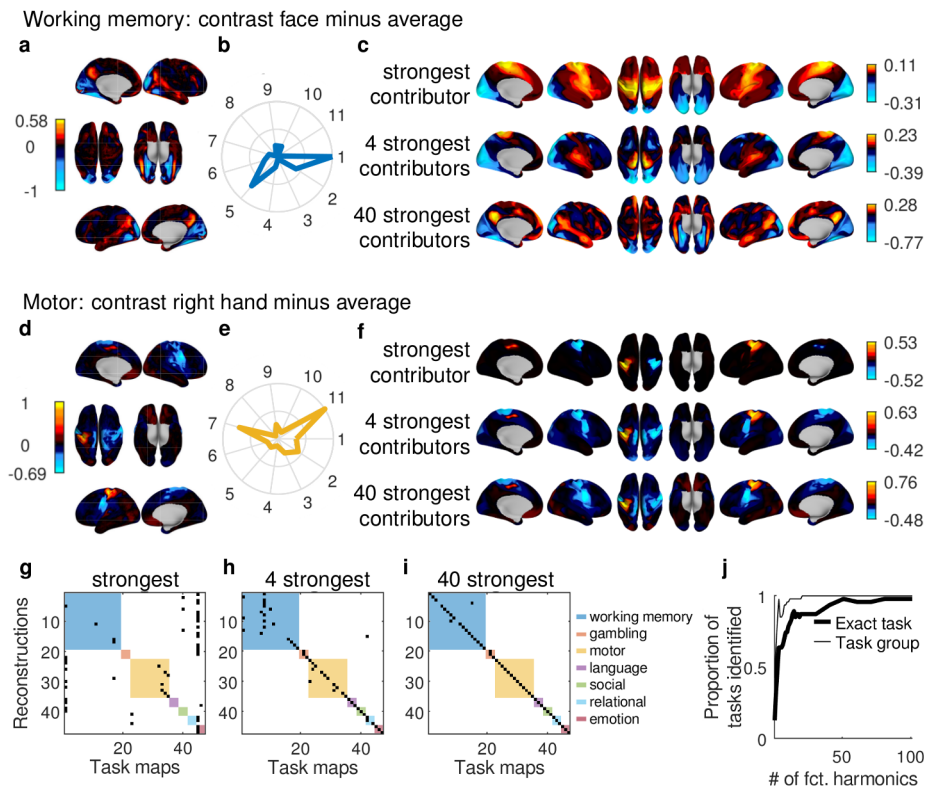

**Figure 6.** a: Map of the contrast between working memory (face) and average working memory from the HCP task dataset<sup>54</sup>, b: Contributions (normalized coefficients of the graph Fourier transform) for the first 11 non-constant functional harmonics, c: Reconstruction of the task map in panel a when using the functional harmonic with the strongest contribution (highest coefficient) only, the four functional harmonics with the strongest contributions, and the forty functional harmonics with the strongest contributions. d-f: The same as a-c using the map of the contrast between motor (right hand) and average motor. g-i: Confusion matrices. Black entries mark the task map-reconstruction-pair which has the lowest reconstruction error, colored squares indicate the task group as in Figure 5. j: Proportion of reconstructions, for each number of harmonics, which have the minimum reconstruction error with their exact original task map (thick line) and a task map belonging to the same group of tasks as the original map (thin line).

260 of harmonics with maximum contribution. If task maps can indeed be characterized by their functional harmonics power  
 261 spectra, the error should be minimal between a reconstruction and its corresponding task map compared to the error of the  
 262 reconstruction of the other 46 task maps. The confusion matrices in Figure 6g-i show the pairs of the original and reconstructed  
 263 task activation maps with the minimum distance when using 1, 4, and 40 functional harmonics with maximum contribution.  
 264 Coloured squares mark the 7 task groups as in Figure 5. The proportion of unambiguously identified tasks in relation to the  
 265 number of functional harmonics is shown in Figure 6j. We found that sparse representations using the 4 functional harmonics  
 266 with the largest power for each task are sufficient to unambiguously characterize the seven task groups with the exception of  
 267 one working memory task (Figure 6h), and 70% of all individual tasks. When the 40 functional harmonics with maximum  
 268 contribution are used, which corresponds to 0.1% of the complete spectrum of functional harmonics, 44 out of 47 task maps are  
 269 correctly identified from their reconstructions (Figure 6i).

270 Overall, our results demonstrate that functional harmonics provide a novel functionally relevant representation, where  
 271 the brain activity accompanying different tasks can be uniquely identified from the activation profiles of a small range of  
 272 functional harmonics.

## 273 Discussion

274 We reveal a previously unknown principle of cortical organization by applying a fundamental principle ubiquitous in nature  
 275 - harmonic modes - to the communication structure of the human brain. The resulting modes termed functional harmonics  
 276 reveal a data-driven, frequency-specific function basis derived from the human resting state functional connectivity matrix and

277 constitute the optimal mapping of the communication structure encoded in this matrix onto the cortex.

278 We demonstrate the meaning of the first 11 functional harmonics as functional communication channels in the brain.  
279 Functional harmonics estimated as the eigenvectors of the graph Laplacian provide an orthogonal function basis that can  
280 reconstruct any pattern of cortical activity. Furthermore, harmonic function bases are unique in that its basis functions exhibit  
281 an implicit ordering according to their wavelength (spatial frequency) and hence provide not only a multi-dimensional but  
282 also a multiscale representation of brain activity. In this work, we show that when this harmonic basis is estimated from the  
283 communication structure of the human brain, each basis function, i.e. each functional harmonic, yields a frequency-specific  
284 communication channel, where specific brain regions communicate through their correlated activity. Crucially, our findings  
285 using the functional harmonic representation suggest that a brain region is able to fulfill a multitude of functions because of its  
286 simultaneous membership in several communication channels, which are orthogonal to each other and separated by spatial  
287 frequency.

288 Moreover, functional harmonics unify the competing views that brain activity arises *either* from smoothly varying gradients  
289 *or* from the modular and specialized regions. Within the functional harmonic framework, specialized regions emerge from  
290 the interaction of functional harmonics across multiple dimensions. Hence our findings provide, to our knowledge, the first  
291 principle that unifies the gradiental and modular aspects and reveals the multi-dimensional nature of cortical organization.

292 Furthermore, by definition, functional harmonics are the extension of the well-known Fourier basis to the functional  
293 connectivity of the human brain. As such they provide a function basis to reconstruct any pattern of brain activity as  
294 superpositions of these harmonic patterns. We explicitly show that functional harmonics are building blocks of cognitive  
295 activity in the brain by characterizing a multitude of task activation maps from their functional harmonic reconstructions. In  
296 particular, our results demonstrate that although there is a multitude of function bases one can choose to represent patterns of  
297 brain activity such as the well-known principal components or independent components of PCA and ICA, functional harmonics  
298 stand out in their ability to capture certain aspects of cortical organization: our findings reveal that out of the 5 function bases  
299 used to represent patterns of cortical activity; i.e. (i) eigenvectors of the FC matrix, (ii) eigenvectors of the adjacency matrix,  
300 (iii) rotated versions of functional harmonics, (iv) PCA, (v) ICA, only the functional harmonics yield both, a delineation of  
301 cortical areas *and* an efficient reconstruction of task activation maps, and thus provide the strongest candidate to be the basis  
302 functions of human cognition.

303 Considering that the principle of harmonic modes when applied to the structural connectivity of the human brain - the  
304 human connectome - have been shown to reveal the functional networks<sup>31</sup>, our results point to the emergence of the same  
305 fundamental principle in multiple aspects of human brain function. Beyond the results presented here, functional harmonics  
306 suggest novel ways to understand the dynamics of the human brain in health and in pathology as well to explore individual  
307 differences within this multi-dimensional harmonic representation.

## 308 References

- 309 1. Felleman, D. J. & Van, D. E. Distributed hierarchical processing in the primate cerebral cortex. *Cereb. cortex (New York,*  
310 *NY: 1991)* **1**, 1–47 (1991).
- 311 2. Tononi, G., Sporns, O. & Edelman, G. M. A measure for brain complexity: relating functional segregation and integration  
312 in the nervous system. *Proc. Natl. Acad. Sci.* **91**, 5033–5037 (1994).
- 313 3. Glasser, M. F. *et al.* A multi-modal parcellation of human cerebral cortex. *Nat.* **536**, 171–178 (2016).
- 314 4. Eickhoff, S. B., Constable, R. T. & Yeo, B. T. Topographic organization of the cerebral cortex and brain cartography.  
315 *Neuroimage* **170**, 332–347 (2018).
- 316 5. Damoiseaux, J. *et al.* Consistent resting-state networks across healthy subjects. *Proc. national academy sciences* **103**,  
317 13848–13853 (2006).
- 318 6. Krubitzer, L. & Kaas, J. The evolution of the neocortex in mammals: how is phenotypic diversity generated? *Curr. opinion*  
319 *neurobiology* **15**, 444–453 (2005).
- 320 7. Varela, F., Lachaux, J.-P., Rodriguez, E. & Martinerie, J. The brainweb: phase synchronization and large-scale integration.  
321 *Nat. reviews neuroscience* **2**, 229 (2001).
- 322 8. Vincent, J. *et al.* Intrinsic functional architecture in the anaesthetized monkey brain. *Nat.* **447**, 83–86 (2007).
- 323 9. Biswal, B., Zerrin Yetkin, F., Haughton, V. & Hyde, J. Functional connectivity in the motor cortex of resting human brain  
324 using echo-planar MRI. *Magn. resonance medicine* **34**, 537–541 (1995).
- 325 10. Deco, G., Jirsa, V. K. & McIntosh, A. R. Emerging concepts for the dynamical organization of resting-state activity in the  
326 brain. *Nat. Rev. Neurosci.* **12**, 43 (2011).

- 327 **11.** Buckner, R. L., Krienen, F. M. & Yeo, B. T. Opportunities and limitations of intrinsic functional connectivity mri. *Nat.*  
328 *neuroscience* **16**, 832 (2013).
- 329 **12.** Cole, M. W., Ito, T., Bassett, D. S. & Schultz, D. H. Activity flow over resting-state networks shapes cognitive task  
330 activations. *Nat. neuroscience* **19**, 1718 (2016).
- 331 **13.** Margulies, D. S. *et al.* Situating the default-mode network along a principal gradient of macroscale cortical organization.  
332 *Proc. Natl. Acad. Sci.* **113**, 12574–12579 (2016).
- 333 **14.** Sereno, M., Pitzalis, S. & Martinez, A. Mapping of contralateral space in retinotopic coordinates by a parietal cortical area  
334 in humans. *Sci.* **294**, 1350–1354 (2001).
- 335 **15.** Penfield, W. & Rasmussen, T. *The cerebral cortex of man; a clinical study of localization of function.* (Macmillan, 1950).
- 336 **16.** Perrone-Capano, C., Volpicelli, F. & di Porzio, U. Biological bases of human musicality. *Rev. Neurosci.* **28**, 235–245  
337 (2017).
- 338 **17.** Goldberg, E. Gradienatal approach to neocortical functional organization. *J. Clin. Exp. Neuropsychol.* **11**, 489–517 (1989).
- 339 **18.** Mesulam, M.-M. From sensation to cognition. *Brain: a journal neurology* **121**, 1013–1052 (1998).
- 340 **19.** Buckner, R. L. & Krienen, F. M. The evolution of distributed association networks in the human brain. *Trends cognitive*  
341 *sciences* **17**, 648–665 (2013).
- 342 **20.** Huntenburg, J. M., Bazin, P.-L. & Margulies, D. S. Large-scale gradients in human cortical organization. *Trends cognitive*  
343 *sciences* **22**, 21–31 (2018).
- 344 **21.** Haak, K. V., Marquand, A. F. & Beckmann, C. F. Connectopic mapping with resting-state fmri. *Neuroimage* **170**, 83–94  
345 (2018).
- 346 **22.** Chladni, E. F. F. *Die Akustik* (Breitkopf & Härtel, 1802).
- 347 **23.** Bedzyk, M. J., Bilderback, D. H., Bommarito, G. M., Caffrey, M. & Schildkraut, J. S. X-ray Standing Waves: A Molecular  
348 Yardstick for Biological Membranes. *Sci.* 1–4 (1988).
- 349 **24.** Schrödinger, E. An undulatory theory of the mechanics of atoms and molecules. *Phys. Rev.* **28**, 1049 (1926).
- 350 **25.** Moon, C. R. *et al.* Quantum Phase Extraction in Isospectral Electronic Nanostructures. *Sci.* **319**, 782–787 (2008).
- 351 **26.** Roos, C. Quantum physics: Simulating magnetism. *Nat.* **484**, 461–462 (2012).
- 352 **27.** Britton, J. W. *et al.* Engineered two-dimensional Ising interactions in a trapped-ion quantum simulator with hundreds of  
353 spins. *Nat.* **484**, 489–492 (2012).
- 354 **28.** Murray, J. D. How the leopard gets its spots. *Sci. Am.* **258**, 80–87 (1988).
- 355 **29.** Xu, Y., Vest, C. M. & Murray, J. D. Holographic interferometry used to demonstrate a theory of pattern formation in  
356 animal coats. *Appl. optics* **22**, 3479–3483 (1983).
- 357 **30.** Levy, B. Laplace-beltrami eigenfunctions towards an algorithm that” understands” geometry. In *IEEE International*  
358 *Conference on Shape Modeling and Applications 2006 (SMI’06)*, 13–13 (IEEE, 2006).
- 359 **31.** Atasoy, S., Donnelly, I. & Pearson, J. Human brain networks function in connectome-specific harmonic waves. *Nat.*  
360 *communications* **7** (2016).
- 361 **32.** Stewart, I. Mathematics: Holes and hot spots. *Nat.* **401**, 863–865 (1999).
- 362 **33.** Nunez, P. L. & Srinivasan, R. A theoretical basis for standing and traveling brain waves measured with human eeg with  
363 implications for an integrated consciousness. *Clin. neurophysiology* **117**, 2424–2435 (2006).
- 364 **34.** Robinson, P. A. *et al.* Eigenmodes of brain activity: Neural field theory predictions and comparison with experiment.  
365 *NeuroImage* **142**, 79–98 (2016).
- 366 **35.** Belkin, M. & Niyogi, P. Laplacian eigenmaps for dimensionality reduction and data representation. *Neural computation*  
367 **15**, 1373–1396 (2003).
- 368 **36.** Tomasi, D., Wang, G.-J. & Volkow, N. D. Energetic cost of brain functional connectivity. *Proc. Natl. Acad. Sci.* **110**,  
369 13642–13647 (2013).
- 370 **37.** Gu, S. *et al.* The energy landscape of neurophysiological activity implicit in brain network structure. *Sci. reports* **8**, 2507  
371 (2018).
- 372 **38.** Gu, S. *et al.* Controllability of structural brain networks. *Nat. communications* **6**, 8414 (2015).

- 373 **39.** Britton, J. W. *et al.* Engineered two-dimensional ising interactions in a trapped-ion quantum simulator with hundreds of  
374 spins. *Nat.* **484**, 489 (2012).
- 375 **40.** Glasser, M. F. *et al.* The minimal preprocessing pipelines for the human connectome project. *Neuroimage* **80**, 105–124  
376 (2013).
- 377 **41.** Van Essen, D. C. *et al.* The WU-Minn human connectome project: an overview. *Neuroimage* **80**, 62–79 (2013).
- 378 **42.** Moeller, S. *et al.* Multiband multislice ge-epi at 7 tesla, with 16-fold acceleration using partial parallel imaging with  
379 application to high spatial and temporal whole-brain fmri. *Magn. Reson. Medicine* **63**, 1144–1153 (2010).
- 380 **43.** Feinberg, D. A. *et al.* Multiplexed echo planar imaging for sub-second whole brain fmri and fast diffusion imaging. *PloS*  
381 *one* **5**, e15710 (2010).
- 382 **44.** Setsompop, K. *et al.* Blipped-controlled aliasing in parallel imaging for simultaneous multislice echo planar imaging with  
383 reduced g-factor penalty. *Magn. resonance medicine* **67**, 1210–1224 (2012).
- 384 **45.** Xu, J. *et al.* Highly accelerated whole brain imaging using aligned-blipped-controlled-aliasing multiband epi. In  
385 *Proceedings of the 20th Annual Meeting of ISMRM*, vol. 2306 (2012).
- 386 **46.** Jenkinson, M., Bannister, P., Brady, M. & Smith, S. Improved optimization for the robust and accurate linear registration  
387 and motion correction of brain images. *Neuroimage* **17**, 825–841 (2002).
- 388 **47.** Van Essen, D. C., Glasser, M. F., Dierker, D. L., Harwell, J. & Coalson, T. Parcellations and hemispheric asymmetries of  
389 human cerebral cortex analyzed on surface-based atlases. *Cereb. cortex* **22**, 2241–2262 (2011).
- 390 **48.** Alexander-Bloch, A. F. *et al.* On testing for spatial correspondence between maps of human brain structure and function.  
391 *Neuroimage* **178**, 540–551 (2018).
- 392 **49.** de Amorim, R. C. & Hennig, C. Recovering the number of clusters in data sets with noise features using feature rescaling  
393 factors. *Inf. Sci.* **324**, 126–145 (2015).
- 394 **50.** Yeo, B. T. *et al.* The organization of the human cerebral cortex estimated by intrinsic functional connectivity. *J.*  
395 *neurophysiology* **106**, 1125–1165 (2011).
- 396 **51.** Zeharia, N., Hertz, U., Flash, T. & Amedi, A. New whole-body sensory-motor gradients revealed using phase-locked  
397 analysis and verified using multivoxel pattern analysis and functional connectivity. *J. Neurosci.* **35**, 2845–2859 (2015).
- 398 **52.** Zeharia, N., Hertz, U., Flash, T. & Amedi, A. Negative blood oxygenation level dependent homunculus and somatotopic  
399 information in primary motor cortex and supplementary motor area. *Proc. Natl. Acad. Sci.* 201119125 (2012).
- 400 **53.** Kuehn, E. *et al.* Body topography parcellates human sensory and motor cortex. *Cereb. Cortex* **27**, 3790–3805 (2017).
- 401 **54.** Barch, D. M. *et al.* Function in the human connectome: task-fMRI and individual differences in behavior. *Neuroimage* **80**,  
402 169–189 (2013).
- 403 **55.** Benson, N. C. *et al.* The human connectome project 7 tesla retinotopy dataset: Description and population receptive field  
404 analysis. *J. vision* **18**, 23–23 (2018).
- 405 **56.** Corbetta, M. & Shulman, G. L. Control of goal-directed and stimulus-driven attention in the brain. *Nat. reviews*  
406 *neuroscience* **3**, 201 (2002).
- 407 **57.** Beauchamp, M. S., Lee, K. E., Argall, B. D. & Martin, A. Integration of auditory and visual information about objects in  
408 superior temporal sulcus. *Neuron* **41**, 809–823 (2004).
- 409 **58.** Levy, I., Hasson, U., Avidan, G., Hendler, T. & Malach, R. Center–periphery organization of human object areas. *Nat.*  
410 *neuroscience* **4**, 533 (2001).
- 411 **59.** Hasson, U., Harel, M., Levy, I. & Malach, R. Large-scale mirror-symmetry organization of human occipito-temporal  
412 object areas. *Neuron* **37**, 1027–1041 (2003).
- 413 **60.** Gusnard, D. A., Akbudak, E., Shulman, G. L. & Raichle, M. E. Medial prefrontal cortex and self-referential mental activity:  
414 relation to a default mode of brain function. *Proc. Natl. Acad. Sci.* **98**, 4259–4264 (2001).
- 415 **61.** Haxby, J. V., Hoffman, E. A. & Gobbini, M. I. The distributed human neural system for face perception. *Trends cognitive*  
416 *sciences* **4**, 223–233 (2000).
- 417 **62.** Leslie, K. R., Johnson-Frey, S. H. & Grafton, S. T. Functional imaging of face and hand imitation: towards a motor theory  
418 of empathy. *Neuroimage* **21**, 601–607 (2004).
- 419 **63.** Raichle, M. *et al.* A default mode of brain function. *Proc. Natl. Acad. Sci.* **98**, 676–682 (2001).

- 420 **64.** Pool, E.-M., Rehme, A. K., Fink, G. R., Eickhoff, S. B. & Grefkes, C. Handedness and effective connectivity of the motor  
421 system. *Neuroimage* **99**, 451–460 (2014).
- 422 **65.** Marcus, D. *et al.* Informatics and data mining tools and strategies for the human connectome project. *Front. neuroinfor-*  
423 *matics* **5**, 4 (2011).
- 424 **66.** MATLAB. *version R2014b* (The MathWorks Inc., Natick, Massachusetts, 2014).
- 425 **67.** Cabral, J. *et al.* Cognitive performance in healthy older adults relates to spontaneous switching between states of functional  
426 connectivity during rest. *Sci. reports* **7**, 5135 (2017).
- 427 **68.** Beckmann, C. F., DeLuca, M., Devlin, J. T. & Smith, S. M. Investigations into resting-state connectivity using independent  
428 component analysis. *Philos. transactions Royal Soc. Lond. Ser. B, Biol. sciences* **360**, 1001–13 (2005).
- 429 **69.** Woolrich, M. W., Behrens, T. E., Beckmann, C. F., Jenkinson, M. & Smith, S. M. Multilevel linear modelling for fmri  
430 group analysis using bayesian inference. *Neuroimage* **21**, 1732–1747 (2004).
- 431 **70.** Jenkinson, M., Beckmann, C. F., Behrens, T. E., Woolrich, M. W. & Smith, S. M. Fsl. *Neuroimage* **62**, 782–790 (2012).

## 432 Online Methods

### 433 Data

434 The data used in this study was acquired and made publically available by the Human Connectome Project, WU-Minn  
435 Consortium (Principal Investigators: David Van Essen and Kamil Ugurbil; 1U54MH091657) funded by the 16 NIH Institutes  
436 and Centers that support the NIH Blueprint for Neuroscience Research; and by the McDonnell Center for Systems Neuroscience  
437 at Washington University. All study protocols were approved by the Washington University institutional review board, and  
438 informed consent was obtained in all cases<sup>40,41</sup>.

439 In this study, we used the dense functional connectivity (FC) matrix, which is part of the Human Connectome Project's 900  
440 subjects data release<sup>40-47</sup>. It is available under [db.humanconnectome.org/data/projects/HCP\\_1200](http://db.humanconnectome.org/data/projects/HCP_1200)<sup>65</sup>. Clicking on "812 Subjects,  
441 recon r227, Dense Connectome" will download the appropriate .zip-archive (user login necessary). The list of names of all  
442 the files used in this study is shown in Table 1. Note that in this release, many of the subjects are related to at least one other  
443 subject of the group. The group average functional connectivity matrix was obtained by correlating group-PCA eigenmaps  
444 from 812 out of the 900 subjects included in this release, which are the subjects that having completed all four sessions of  
445 15-minute resting state fMRI.

446 For task reconstructions, we used data contained in the S1200 group average data release, which is available on  
447 [www.humanconnectome.org/study/hcp-young-adult/document/extensively-processed-fmri-data-documentation](http://www.humanconnectome.org/study/hcp-young-adult/document/extensively-processed-fmri-data-documentation), as  
448 "HCP\_S1200\_GroupAvg\_v1 Dataset".

449 For the analyses involving retinotopic maps, we used data available on [osf.io/bw9ec/](http://osf.io/bw9ec/) and described in Benson et al. (2018)<sup>55</sup>.  
450 The relevant file is named "prfresults.mat" and contains a variable "allresults" of dimensionality 91282 (grayordinates)  $\times$   
451 6 (quantities)  $\times$  184 (181 subjects plus 3 different group averages)  $\times$  3 (model fits). We used only the quantities 'ang'  
452 and 'ecc', the first model fit, of the group average across all available subjects, which uses all available time points. See  
453 [osf.io/bw9ec/wiki/home/](http://osf.io/bw9ec/wiki/home/) for details.

454 Data are encoded in CIFTI file format<sup>40</sup>, which means that coordinates are defined on the cortical surface ("grayordinates"),  
455 i.e. using  $n$  vertices rather than voxels<sup>47</sup>. The file was read using connectome workbench functions<sup>65</sup> and converted to a single  
456 precision vector of length  $(n \cdot n - n)/2$  (due to its symmetry) using Matlab<sup>66</sup>. We also excluded the medial wall. This reduced  
457 the size of the FC matrix in memory from 33 GB to approximately 6 GB, greatly easing subsequent computations. The loss  
458 in precision is negligible compared to the accuracy with which pairwise correlation can be estimated from noisy fMRI time  
459 courses.

460 For visualization purposes, we used the surfaces provided with the functional data.

### 461 Software

462 All data analysis was performed using MATLAB 2014b or 2017b, using also scripts and functions from the following freely  
463 available software packages:

- 464 • Fieldtrip version 20180903
- 465 • Connectome workbench (<https://www.humanconnectome.org/software/connectome-workbench>)
- 466 • gifti toolbox (<https://www.artefact.tk/software/matlab/gifti/>)

### 467 Background: Functional Harmonics

468 The approach presented here relies on representing the human brain's communication structure (dFC) as a graph and estimating  
469 the eigenfunctions of graph Laplacian applied to this structure. The graph representation of the brain's communication  
470 structure  $\mathcal{G} = (\mathcal{V}, \mathcal{E})$  is created by representing the vertices sampled from the gray matter cortical surface as the nodes  
471  $\mathcal{V} = \{v_i | i \in 1, \dots, n\}$  with  $n$  being the total number of nodes ( $n = 59.412$  in this study) and by representing the connections  
472 between the vertices as the edges  $\mathcal{E} = \{e_{ij} | (v_i, v_j) \in \mathcal{V} \times \mathcal{V}\}$ , which come from the connections in the dFC matrix. We  
473 represent this graph structure  $\mathcal{G}$  by its  $n \times n$  adjacency matrix  $A = [a_{ij}]$  that is formed by connecting each node  $i$  to its  $k$ -nearest  
474 neighbours ( $k = 300$  in this study) according to its correlations in the dFC matrix, i.e.:

$$a_{ij} = \begin{cases} 1 & c_{ij} \in \kappa_i, \forall j: 1 \leq j \leq n, j \neq i \\ 0 & c_{ij} \notin \kappa_i, \forall j: 1 \leq j \leq n, j \neq i \end{cases}, \quad (1)$$

475 where  $\kappa_i$  is the set of the  $k$  largest values in row  $i$  in the dFC matrix. In order to ensure  $A$  is symmetric, we also set  $a_{ji} = 1$ , if  
476  $a_{ij} = 1$ . Defining  $\mathbf{A}$  as such results in a symmetrical sparse binary matrix.

**Table 1.** Files used in our computations. All data was downloaded from the human connectome project database (db.humanconnectome.org/data/projects/HCP\_1200) unless otherwise specified.

| Purpose                              | file name                                                                                                                                                                                                                                                                                                          | comment                                                                      |
|--------------------------------------|--------------------------------------------------------------------------------------------------------------------------------------------------------------------------------------------------------------------------------------------------------------------------------------------------------------------|------------------------------------------------------------------------------|
| Dense functional connectivity matrix | HCP_S900_820_rfMRI_MSMA11_groupPCA_d4500ROW...<br>...zcorr.dconn.nii                                                                                                                                                                                                                                               |                                                                              |
| Medial wall index file               | Human.MedialWall_Conte69.32k_fs_LR.dlabel.nii                                                                                                                                                                                                                                                                      |                                                                              |
| Cortical surfaces                    | S900.<hemisphere>.inflated_MSMA11.32k_fs_LR.surf,<br>S900.<hemisphere>.flat.32k_fs_LR.surf.gii,<br><hemisphere>.sphere.32k_fs_LR.surf.gii (downloaded from BALS<br>A database, <a href="http://balsa.wustl.edu">balsa.wustl.edu</a> )                                                                              | replace<br><hemisphere><br>with "L" for left<br>hemisphere, "R" for<br>right |
| Cortical surface labels              | Q1-Q6_RelatedValidation210.<hemisphere>. ...<br>...CorticalAreas_Final_Final_Areas_Group_Colors.32k_fs_LR.label.gii                                                                                                                                                                                                | replace<br><hemisphere><br>with "L" for left<br>hemisphere, "R" for<br>right |
| Borders                              | Parcellation: Q1-Q6_RelatedParcellation210. ...<br>...<hemisphere>.CorticalAreas.32k_fs_LR.border,<br>Somatotopy: Q1-Q6_RelatedParcellation210. ...<br>...<hemisphere>.SubAreas.32k_fs_LR.border                                                                                                                   | replace<br><hemisphere><br>with "L" for left<br>hemisphere, "R" for<br>right |
| HCP atlas colours                    | atlas.mat from <a href="https://osf.io/bw9ec/">osf.io/bw9ec/</a>                                                                                                                                                                                                                                                   |                                                                              |
| Task maps                            | HCP_S1200_997_tfMRI_ALLTASKS_level2_cohensd...<br>...hp200_s2_MSMA11.dscalar.nii<br><a href="http://www.humanconnectome.org/study/hcp-young-adult/document/extensively-processed-fmri-data-documentation">www.humanconnectome.org/study/hcp-young-adult/document/extensively-processed-fmri-data-documentation</a> | 2 mm smoothing kernel                                                        |
| Retinotopy maps                      | prfresults.mat from <a href="https://osf.io/bw9ec/">osf.io/bw9ec/</a>                                                                                                                                                                                                                                              | using "group subject"<br>(ID 999999) and full<br>model fit                   |
| Yeo et al. 7-networks parcellation   | RSN-networks.<hemisphere>.32k_fs_LR.label                                                                                                                                                                                                                                                                          | replace<br><hemisphere><br>with "L" for left<br>hemisphere, "R" for<br>right |
| Principal components                 | HCP_S1200_812_rfMRI_MSMA11_groupPCA_d4500_Eigenmaps ...<br>...recon2.dtsseries.nii                                                                                                                                                                                                                                 |                                                                              |
| Independent components               | melodic_IC.dscalar.nii                                                                                                                                                                                                                                                                                             | exists for each number<br>of ICs (15, 25, 50,<br>100, 200, 300)              |

Then we estimate the graph Laplacian defined as

$$\mathbf{L}_{\mathcal{G}} = \mathbf{D} - \mathbf{A} , \quad (2)$$

where  $\mathbf{A}$  is the adjacency matrix as defined above, and  $\mathbf{D}$  is the degree matrix, which is defined as a diagonal matrix with diagonal elements

$$d_{ii} = \sum_{j=1}^n a_{ij} . \quad (3)$$

As such, the degree matrix  $\mathbf{D}$  contains each node's degree in its diagonal. Finally, we estimate the functional harmonics as the eigenfunctions  $\Psi = \{\psi_1, \psi_2, \dots, \psi_n\}$  by solving:

$$\mathbf{L}_{\mathcal{G}} \psi_i = \lambda_i \psi_i, \quad i \in \{0, 1, \dots, n\} , \quad (4)$$

477 where  $\psi_i$  are the  $n \times 1$  eigenvectors and  $\lambda_i$  are the corresponding eigenvalues.

### 478 Control function bases

- 479 1. Spherical rotations: We performed comparisons against spherical rotations of surface maps. We followed<sup>48</sup>, adapting  
480 freely available code ([github.com/spin-test/spin-test](https://github.com/spin-test/spin-test)) to be used with HCP surfaces. In this approach,  
481 surface maps are projected to a spherical surface and then rotated by a random angle. Values are then mapped back to  
482 the nearest vertex, and the map is symmetrized in order to preserve this property. Parts of the corpus callosum that are  
483 rotated to the cortical surface are labelled as missing data (NaNs) and are ignored in any subsequent calculations (e.g.  
484 within- and across area distances, see below). Since we used multi-dimensional function based, we rotated the surface  
485 maps corresponding to each dimension by the same angle. Note that, however, the resulting rotated function basis is no  
486 longer orthonormal due to the symmetry preserving step.
- 487 2. Principal components (PCs): PCA (principal component analysis) is a popular dimensionality reduction technique which  
488 preserves the maximum amount of variance in the data. It consists of taking the eigenvectors of the covariance matrix of  
489 the time series. These principal components are provided by the HCP via Connectome DB (see Table 1). The first 20  
490 PCs are shown in SI Figure 6.
- 491 3. Eigenvectors of the dense FC: An intuitive basis is to take the eigenvectors of the dense FC without applying a threshold  
492 as done for obtaining the adjacency matrix. These eigenvectors have been shown to contain valuable information about  
493 dynamical FC<sup>67</sup>. The first 20 eigenvectors of the dense FC are shown in SI Figure 5.
- 494 4. Eigenvectors of the adjacency matrix: In order to test the effect of thresholding/binarizing on the one hand and the effect  
495 of using the graph Laplacian instead of the adjacency matrix itself on the other, we also compared to the eigenvectors of  
496 the adjacency matrix, i.e. the dense FC thresholded such that only the 300 nearest neighbors of each vertex are retained  
497 and set to 1. The first 20 eigenvectors of the adjacency are shown in SI Figure 4.
- 498 5. Independent components (ICs): A very popular dimensionality reduction technique in resting state fMRI<sup>68</sup>, independent  
499 component analysis is the foremost method for obtaining resting state networks. It consists of analyzing the time series of  
500 the data and finding those spatial patterns that are maximally independent. We tested all sets of ICs that are provided by  
501 the HCP (see Table 1, and found that the set with the lowest number of components, i.e.  $n = 15$ , performs best. Therefore,  
502 we restricted our comparisons to this set of ICs. Note that ICs are not orthonormal and therefore do not form a basis in  
503 the strictly mathematical sense. The 15 ICs used in our comparisons are shown in SI Figure 7.

### 504 Monte Carlo simulations

505 We used a Monte-Carlo approach for statistical validation.

506 For the silhouette values, we followed<sup>48</sup>, where permutations consist of rotated surface maps (see previous section) of the  
507 functional harmonics as well as principal components, independent components, eigenvectors of the dense FC, and eigenvectors  
508 of the adjacency matrix. Silhouette values were then computed for the original, non-rotated map as well as for  $n = 220$  rotated  
509 maps, and p-values were computed based on the number  $P$  of rotations that performed better than the original map:

$$p = (P + 1)/(n + 1) \quad (5)$$



510 We performed Bonferroni correction by multiplying the resulting p-value by 11, i.e. the number of dimensions that was  
511 tested.

512 We used the same approach for the somatotopy index, but only applied to the functional harmonics and their rotations.  
513 Since in this case, we had five somatotopic areas (we averaged over the two hemispheres) and tested three of the 11 functional  
514 harmonics ( $\psi_3$ ,  $\psi_7$ , and  $\psi_{11}$ ), we required  $n = 300$  rotations in order to achieve a significance level of  $\alpha = 0.05$  with 15  
515 comparisons.

516 We also applied a Monte-Carlo permutation test to the mean reconstruction errors by permuting the labels of the basis 1000  
517 times for each control basis. Here, we pooled the reconstruction errors over the first 11 non-constant components. For the  
518 overall reconstruction performance, we also pooled all 47 task maps; for ad-hoc tests of each task category, we pooled only  
519 over the tasks in each category.

## 520 Silhouette values

To test whether isolines of the functional harmonics follow the boundaries of the parcels as defined in the HCP parcellation<sup>3</sup>,  
we compute the silhouette value<sup>49</sup> of each functional harmonic as:

$$S = \frac{1}{N} \sum_i (M_{\text{between}}(i) - M_{\text{within}}(i)) / \max(M_{\text{between}}(i) - M_{\text{within}}(i)) , \quad (6)$$

521 where  $M_{\text{between}}(i)$  is the average Euclidean distance between vertices belonging to a parcel  $i$  and vertices belonging to all other  
522 parcels, while  $M_{\text{within}}(i)$  is the average distance between vertices within the parcel  $i$ . If all vertices belonging to a parcel  $i$  have  
523 the same value, and at least some vertices outside the parcel  $i$  have different values, then  $M_{\text{between}}(i) > 0$ ,  $M_{\text{within}}(i) = 0$  and  
524  $S(i) = 1$ . By averaging over the silhouette values of all parcels, one obtains a measure of how well the data fit the parcellation.  
525 Note that we replaced the somatosensory/motor core areas 1, 2, 3a, 3b, and 4 with the somatotopic sub-areas given by the HCP<sup>3</sup>  
526 for a more detailed evaluation.

527 To evaluate the somatotopic organization of the functional harmonics, we use a measure that was similar to the silhouette  
528 value, but adapted to measure the separation from the rest of the cortex *and* from other somatotopic areas.

$$S_{\text{som}} = (M_{\text{between,som}} + M_{\text{between}}) / \max(M_{\text{between,som}}, M_{\text{between}}) \cdot M_{\text{between,som}} , \quad (7)$$

529 where  $M_{\text{between,som}}$  is the average Euclidean distance between vertices belonging to a somatotopic area and all other vertices  
530 belonging to all other somatotopic areas. The first term of the equation is between 1 and 2 and is close to 2 if both  $M_{\text{between,som}}$   
531 and  $M_{\text{between}}$  are equal. Multiplying by  $M_{\text{between,som}}$  ensures that  $S_{\text{som}}$  is not large if both  $M_{\text{between,som}}$  and  $M_{\text{between}}$  are small.

## 532 Task maps

533 We used group-averaged task activation maps provided with the S1200 group average data release of the HCP (see Table 1,  
534 [www.humanconnectome.org/study/hcp-young-adult/document/extensively-processed-fmri-data-documentation](http://www.humanconnectome.org/study/hcp-young-adult/document/extensively-processed-fmri-data-documentation)). Here we  
535 provide a summary of the tasks that form part of the HCP task battery<sup>54</sup>. There are 7 groups of tasks: working memory, motor,  
536 gambling, language, social, emotional, relational. Subjects performed all tasks in two separate sessions (working memory,  
537 gambling, and motor in the first session, language, social cognition, relational processing, and emotion processing in the  
538 second).

539 *Working memory.* Four different stimulus types were used, presented in separate blocks: pictures of faces, places, tools and  
540 body parts. Two different task types were used: a 2-back working memory task, where subjects had to respond if a stimulus  
541 matched that two trials back, and a 0-back working memory task, where subjects had to respond whenever a single stimulus  
542 returned that was presented at the beginning of the block. This results in a total of 19 different working memory task maps,  
543 consisting of 14 activation maps (such as 0-back, 2-back, face, body, etc.) and 5 contrasts (between the two task types, between  
544 each stimulus type and the average across all stimuli, etc.).

545 *Motor.* Visual cues indicated whether participants should move their left or right fingers, left or right toes, or move their  
546 tongue. The goal was to identify the motor areas that correspond to these five body parts. This results in 26 different task maps  
547 (7 activation maps for 5 body parts plus visual cue plus average, and 6 contrast maps).

548 *Gambling.* (Incentive processing.) Subjects played a game in which they could win or lose money. The game was to guess  
549 whether the number on a "mystery card" that could range between 1 and 9 would be less or more than 5. The numbers were  
550 given after subjects made their guess and were chosen according to the trial type: "win" - the number would correspond to their  
551 guess and they would win 1\$; "neutral" - the number would equal 5 and they would neither win nor lose any money; "loss"  
552 - the number would not correspond to the guess and participants would lose \$0.50. Separate blocks are used in which trials

553 are either mostly win or mostly lose, resulting in two conditions, punish and reward. This results in 3 different task maps (2  
554 activation maps, i.e. one for each condition, and 1 contrast).

555 *Language.* Two different task types were used, "story" and "math". "Story" consisted of participants listening to 5-9  
556 sentences of a story, and answering a 2-alternative forced choice question thereafter. "Math" required participants to solve  
557 simple addition and subtraction problems. The two task types are similar in terms of auditory input and attentional load, but  
558 different in terms of semantic and numerosity related processing. As for gambling, the two task types result in 3 task maps (2  
559 activation, 1 contrast).

560 *Social.* (Theory of Mind, TOM.) Subjects viewed videos of objects (squares, circles, triangles) that moved around in one of  
561 two ways: "Random" - there was no interaction between the objects, or "TOM" - the objects moved as if they were reacting to  
562 the other objects' "thoughts and feelings". They then had to judge whether the objects were interacting or not, or respond with  
563 "not sure". As with gambling and language, the two task types result in 3 task maps (2 activation, 1 contrast).

564 *Emotional.* Subjects viewed one of two types of stimuli, "faces" or "shapes", and had to decide which of two stimuli  
565 presented at the bottom of the screen matched the stimulus at the top of the screen. The faces included emotional stimuli, i.e.  
566 angry or fearful expressions. Again, the two task types result in 3 task maps (2 activation, 1 contrast).

567 *Relational.* There were two conditions, "match" and "relational". In all cases, stimuli can have one of six shapes combined  
568 with one of six textures. In the "match" condition, which served as a control condition, two shapes were presented at the top  
569 and one at the bottom of the screen. A word ("shape" or "texture") that appears in the middle of the screen instructs subjects to  
570 decide whether the bottom stimulus matches either of the top stimuli in the dimension indicated by the word. In the "relational"  
571 condition, two stimuli are presented each at the top and at the bottom of the screen, with no word in the middle. Instead,  
572 participants have to determine themselves across which dimension the top pair differs, and, subsequently, indicate whether the  
573 bottom pair differs over the same dimension. Again, the two task types result in 3 task maps (2 activation, 1 contrast).

574 Task maps were computed using FSL's FEAT and FLAME<sup>69,70</sup> and conducting a between-subject ("level 2") analysis,  
575 resulting in effect sizes (Cohen's d). We used the task maps with minimal smoothing (2mm total smoothing); see 1200 subjects  
576 data release reference manual, pp. 45-54 and 100-104.

## 577 **Reconstructing the task maps from functional harmonics**

The spatial pattern of each task map on the cortex  $s(v)$  was decomposed into and reconstructed from the functional harmonics  $\Psi = \{\psi_k\}_{k=1}^n$  as:

$$\hat{s} = \alpha_1 \psi_1 + \alpha_2 \psi_2 + \dots + \alpha_n \psi_n = \sum_{k=1}^n \alpha_k \psi_k(v), \quad (8)$$

where the coefficient  $\alpha_k$  of each functional harmonic  $\psi_k$  was estimated by projecting the task map  $\hat{s}(v)$  onto that particular harmonic  $\psi_k$ . As such  $\alpha_k$  are estimated as:

$$\alpha_k = \langle \hat{s}, \psi_k \rangle. \quad (9)$$

578 Then, each task map is reconstructed using Eq. 8. In this study, we limit our reconstructions to using a maximum of 100  
579 non-constant functional harmonics ( $n = 101$ ).

For a reconstruction  $s^*(m)$ , where  $m$  indicates a binary vector of dimensionality  $101 \times 1$  which contains ones for harmonic basis functions that are used in the reconstruction and zeros otherwise, we then compute the reconstruction error as:

$$RE_{(m)} = \sqrt{\sum_i (s_i - s_{(m),i}^*)^2 / \sum_i s_i^2} \quad (10)$$

580 We also computed the Pearson correlations between  $s$  and  $s^*(m)$ . For comparing the correlations between task maps and  
581 reconstructions obtained from real functional harmonics versus randomized connectivity harmonics, we considered the number  
582 of comparisons to be  $nC = nTasks \cdot nLevels$ , where the number of tasks equals 47 and the number of levels refers to the different  
583 numbers of harmonics used in the reconstructions, i.e. 0, 1, 2, 3, ..., 20, 30, 40, ..., 100, in 29 levels. From this we obtained a  
584 corrected alpha level of  $\alpha_{corr} = 0.05/nC$ , and we computed the critical value as Fisher's z-transform of the correlation which a  
585 sample has to exceed in order to be significantly higher than the random correlation:

$$z_{crit} = \frac{z\alpha \cdot \left( \sqrt{\frac{1}{N_1-3} + \frac{1}{N_2-3}} \right)}{z_{rand}} \quad (11)$$

586 We obtain  $z_{\text{crit}} = 0.44$ , which corresponds to a minimum required empirical correlation of 0.41, with  $N_1 = N_2 = 59.412$   
587 (the number of vertices that contribute to the correlation values),  $z_{\alpha} = 0.438$  (the inverse Student's t distribution with  
588  $N_1 = N_2 = 59.412$  degrees of freedom evaluated at  $1 - \alpha_{\text{corr}}$ ), and  $z_{\text{rand}} = \text{atanh}(0.05)$  (Fisher's z-transform of the maximal  
589 random correlation between any reconstruction - with any number of functional harmonics - and any task).

## 590 **Visualization**

591 *Somatotopic areas.* In the visual and somatosensory/motor cortices, functional harmonics are rather determined by retinotopy  
592 and somatotopy than by anatomical or microstructural features. For the former, somatotopic areas occupy exactly the same  
593 surface area as the sensorimotor core areas, 1, 2, 3a, 3b, and 4. We therefore replaced, where appropriate, the borders of the  
594 HCP parcellation by the borders of the five somatotopic regions.

595 *Parcel borders for visualization.* In order to discuss the meaning of the functional harmonics, we show borders of certain  
596 parcels on the cortical surfaces (Figure 2). We used three different methods to select which borders to show. First, for some  
597 functional harmonics, it was feasible to select these areas manually (for example, early visual areas in functional harmonic 4,  
598 somatotopic areas in functional harmonics 3 and 4). The anatomical supplementary information from Glasser et al. (2016)<sup>3</sup>  
599 uses a functional grouping of many regions that we often used as a guideline, for instance to distinguish between early and  
600 association auditory cortex. Second, for some functional harmonics (for instance, functional harmonics 1 and 2), we show  
601 the borders of parcels that belong to resting state networks as defined by Yeo et al. (2011)<sup>50</sup>. The 7-network parcellation is  
602 provided by the HCP, which does not perfectly overlap with the HCP parcellation. We adjusted the network borders slightly to  
603 align the network borders to follow those of the parcels defined in HCP. Thereby we assigned each parcel to the RSN with  
604 which it had the most overlap. Third, some functional harmonics are too complex to manually select areas or networks (namely,  
605 functional harmonics 5, 6, 8, and 10). Here we employed simple k-means clustering on the functional harmonic, using k=2  
606 (functional harmonics 5, 6, and 8) or k=3 (functional harmonic 10). To obtain meaningful clusters in the somatosensory/motor  
607 cortex, we again replaced the sensorimotor core regions 1, 2, 3a, 3b and 4 with the somatotopic areas. For this purpose, we used  
608 vertices within the core regions and re-assigned them to the somatotopic areas based on their distances to the sub-area borders.

## 609 **Author contributions statement**

610 S. A. and K. G. designed the methodology and the analysis. J. P. and G. D. contributed to the design of the study. M. L. K.  
611 contributed to design of the methodology and the statistical analysis. M. L. K. and P. H. aided in the interpretation of the results.  
612 S. A., K. G. and M. L. K. wrote the manuscript. All authors reviewed the manuscript.

## 613 **Data availability**

614 All data generated in this study are available from the corresponding author upon reasonable request.

## 615 **Code availability**

616 All custom scripts used in this study are available from the corresponding author upon reasonable request.

## 617 **Additional information**

618 **Competing financial interests** The authors declare no competing financial interests.
