# Supplementary material for: Functional harmonics reveal multi-dimensional basis functions underlying cortical organization
Source: bioRxiv or medRxiv preprint supplement (doi:10.1101/699678), 2020-07-20
Supplement: Supplementary file [file media-1.pdf]

# Supplementary Material for Functional harmonics reveal multi-dimensional basis functions underlying cortical organization

Katharina Glomb<sup>1,\*</sup>, Morten L. Kringelbach<sup>2,3</sup>, Gustavo Deco<sup>4,5,6,7</sup>, Patric Hagmann<sup>1</sup>, Joel Pearson<sup>8</sup>, and Selen Atasoy<sup>2,3</sup>

<sup>1</sup>Department of Radiology, Lausanne University Hospital and University of Lausanne (CHUV-UNIL), Lausanne, Switzerland

<sup>2</sup>Department of Psychiatry, University of Oxford, Oxford, United Kingdom

<sup>3</sup>Center of Music in the Brain (MIB), Clinical Medicine, Aarhus University

<sup>4</sup>Center of Brain and Cognition, Universitat Pompeu Fabra, Barcelona, Spain

<sup>5</sup>ICREA, Institutió Catalana de Recerca i Estudis Avancats (ICREA), Spain

<sup>6</sup>Department of Neuropsychology, Max Planck Institute for Human Cognitive and Brain Sciences, Leipzig, Germany

<sup>7</sup>School of Psychological Sciences, Monash University, Melbourne, Australia

<sup>8</sup>School of Psychology, University of New South Wales, Sydney Australia

\*katharina.glomb@gmail.com

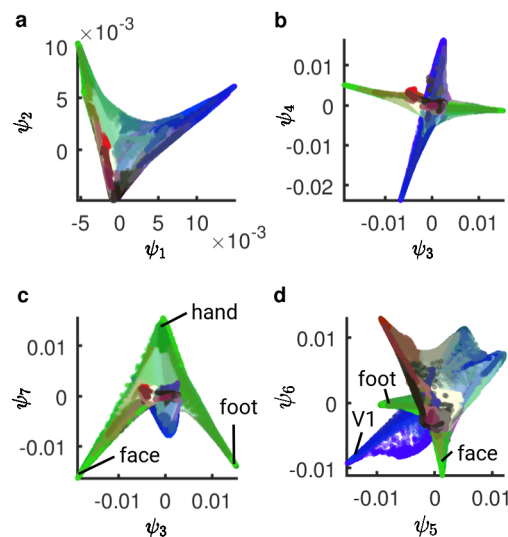

**Supplementary Figure 1.** Two-dimensional subspaces formed by pairs of functional harmonics, referred to as  $\psi$ . The color code is taken from the HCP parcellation<sup>2</sup>, with blue corresponding to visual areas, red, auditory areas, and green, somatosensory/motor areas, and the color gradient running from white to black signifying task-positive to task-negative areas. a: Two-dimensional subspace formed by functional harmonics 1 and 2 ( $\psi_1$  and  $\psi_2$ ). This reproduces findings from<sup>2</sup>, where visual areas (blue), somatosensory/motor areas (green) and higher-order areas belonging to the default mode network (black) are separated from each other. b: Two-dimensional subspace formed by functional harmonics 3 and 4 ( $\psi_3$  and  $\psi_4$ ). Visual (blue) and somatosensory/motor/auditory (green and red) systems are orthogonal to each other. c: Two-dimensional subspace formed by functional harmonics 3 and 7 ( $\psi_3$  and  $\psi_7$ ). A different separation of somatotopic regions from that shown in Figure 3a is apparent. d: Two-dimensional subspace formed by functional harmonics 5 and 6 ( $\psi_5$  and  $\psi_6$ ). V1 (blue), two somatotopic areas (hand and face, green) and auditory areas (red) are separated from each other and from remaining areas.

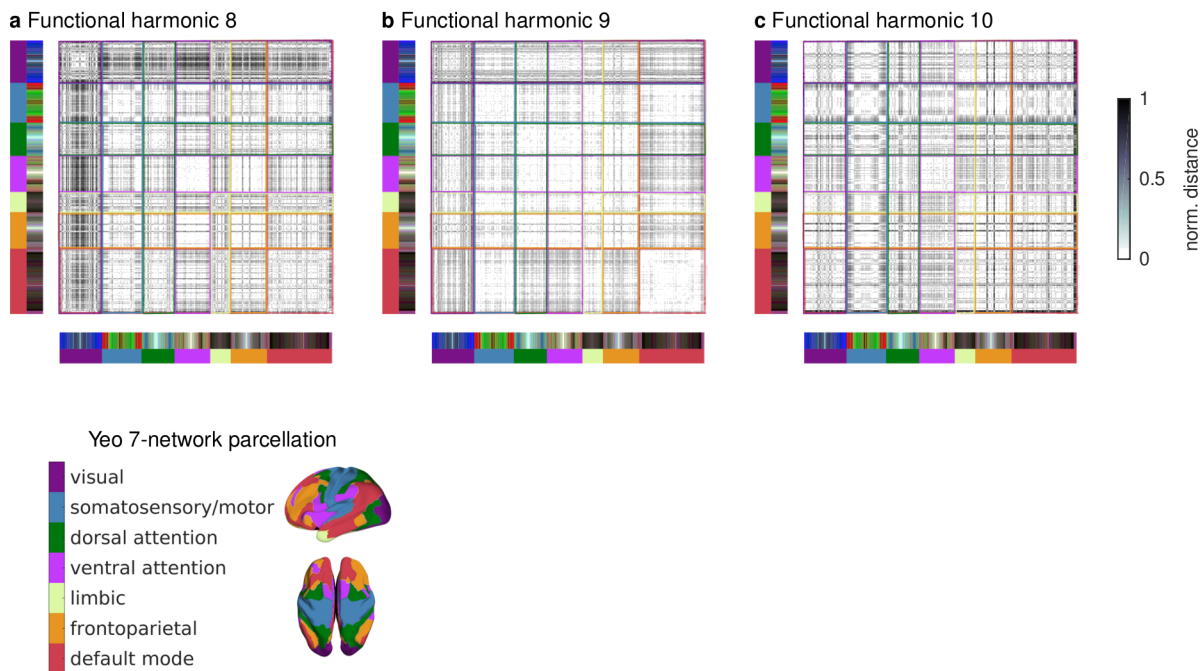

**Supplementary Figure 2.** Normalized average Euclidean distances between all pairs of parcels, ordered by resting state network (RSN) membership according to the Yeo 7-Network parcellation<sup>2</sup> (see legend), for functional harmonics 8 (panel a), 9 (panel b), and 10 (panel c). The color code of the HCP parcellation<sup>2</sup> is also shown; parcels are symmetrically arranged across hemispheres within each RSN.

Figure ?? illustrates how functional harmonics 8-10 exhibit different divisions between higher order networks defined by the 7-network resting state network (RSN) parcellation by Yeo and colleagues<sup>2</sup>. In functional harmonic 8 (Figure ??a), the distances within the ventral attention network (vATT) are very small, as well as distances between regions belonging to the vATT and the frontal parietal network (FPN). As shown in Figure 3d, we observe a strong retinotopic gradient across regions V1-V4, which is reflected by high distances within the visual RSN.

In functional harmonic 9, most RSNs show small within-network distances, particularly the somatosensory/motor, dorsal and ventral attention, as well as default mode networks. Small distances also occur between the somatosensory/motor and default mode networks.

In functional harmonic 10, only the ventral attention and limbic networks exhibit small within- (but not between-) network distances. Notably, auditory regions are strongly separated from somatosensory/motor network, in concordance with findings shown in Figure 3b. Also, certain regions of the frontoparietal network appear to be strongly separated from all other networks (black bands within frontoparietal network running across all other networks).

Figure ?? shows the "somatotopy index", which quantifies to which degree somatotopic areas (face, eye, hand, trunk, foot) are well-circumscribed by the functional harmonics. We again use the Euclidean distances on the functional harmonics (as in Figures ??-??, see Online Methods for details). We plot this "somatotopy index" for each somatotopic region on the original functional harmonics (circles), compared to spherical rotations (gray crosses, 300 rotations). Higher indices mean a clearer separation, and the results correspond to what can be visually appreciated in Figure 2. For example, the separation of the hand-areas is especially strong in functional harmonic 11.

Figures ?? to ?? show, for the 7 task groups used by the HCP<sup>2</sup>, all task maps (left columns) with the normalized power spectra over the first 11 non-constant functional harmonics (middle columns), and the reconstructed maps using the strongest, four strongest, and forty strongest contributing functional harmonics (right columns). In cases where the strongest contributing functional harmonic was the "0th", i.e. the constant functional harmonic, we show the 2nd-strongest, i.e. the strongest non-constant functional harmonic in the right column. This is case in Figure ??o, Figure ??i, Figure ??c,f,l,x,ad, Figure ??c,f, Figure ??c,f. In those cases, the maximum value in the polar plot in the middle column may not be 1, because the "0th" functional harmonic is not shown in these plots. Note that however the reconstructions using more than one functional harmonic do use the constant functional harmonic. Importantly, there was no task whose strongest contributing functional harmonic was beyond the 11th non-constant functional harmonic.

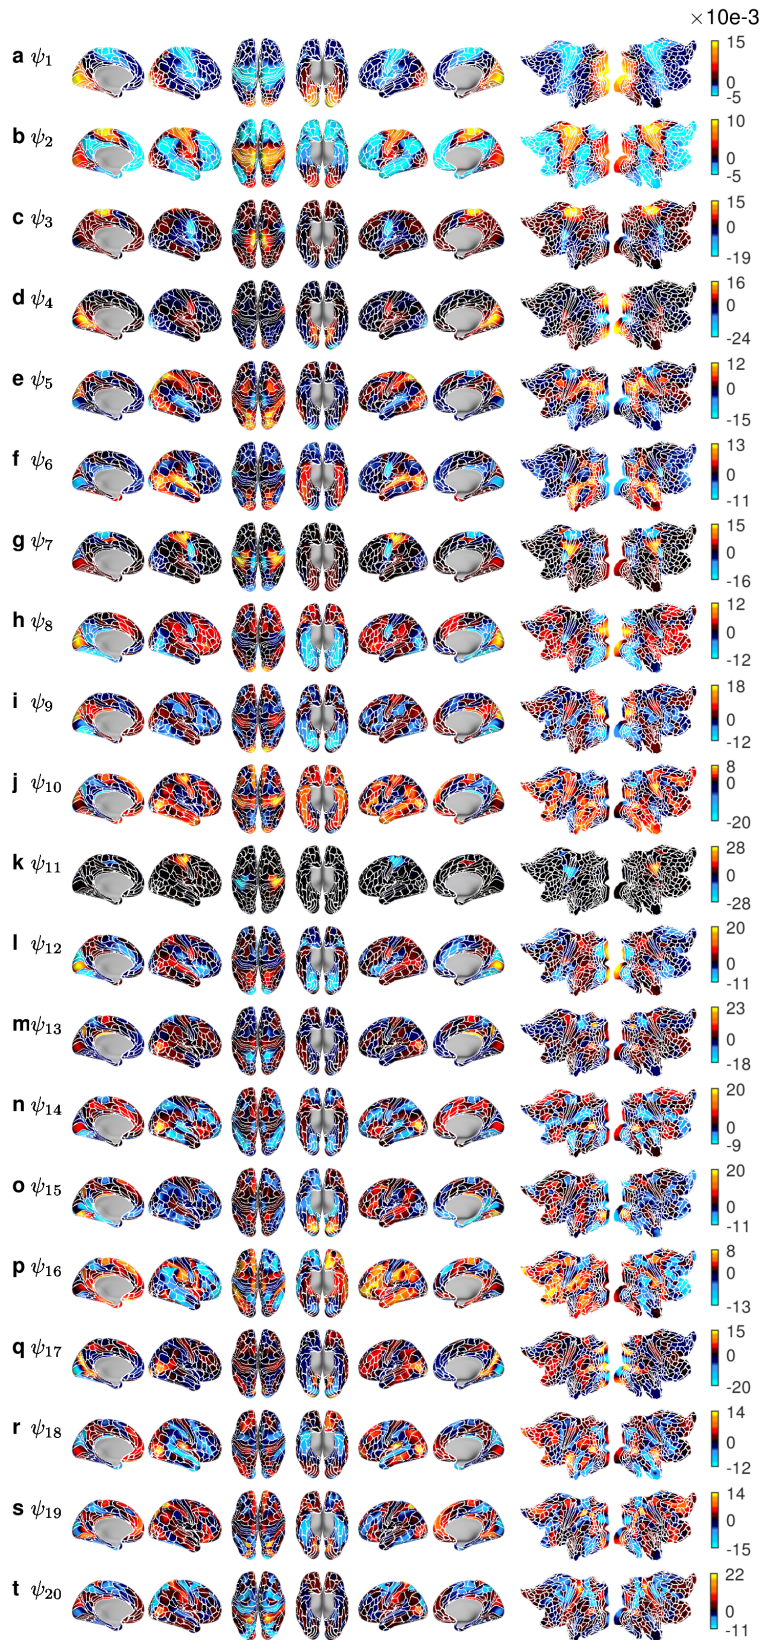

**Supplementary Figure 3.** First 20 functional harmonics (referred to as  $\psi_1$ - $\psi_{20}$ ) with all borders defined in the HCP parcellation<sup>2</sup>.

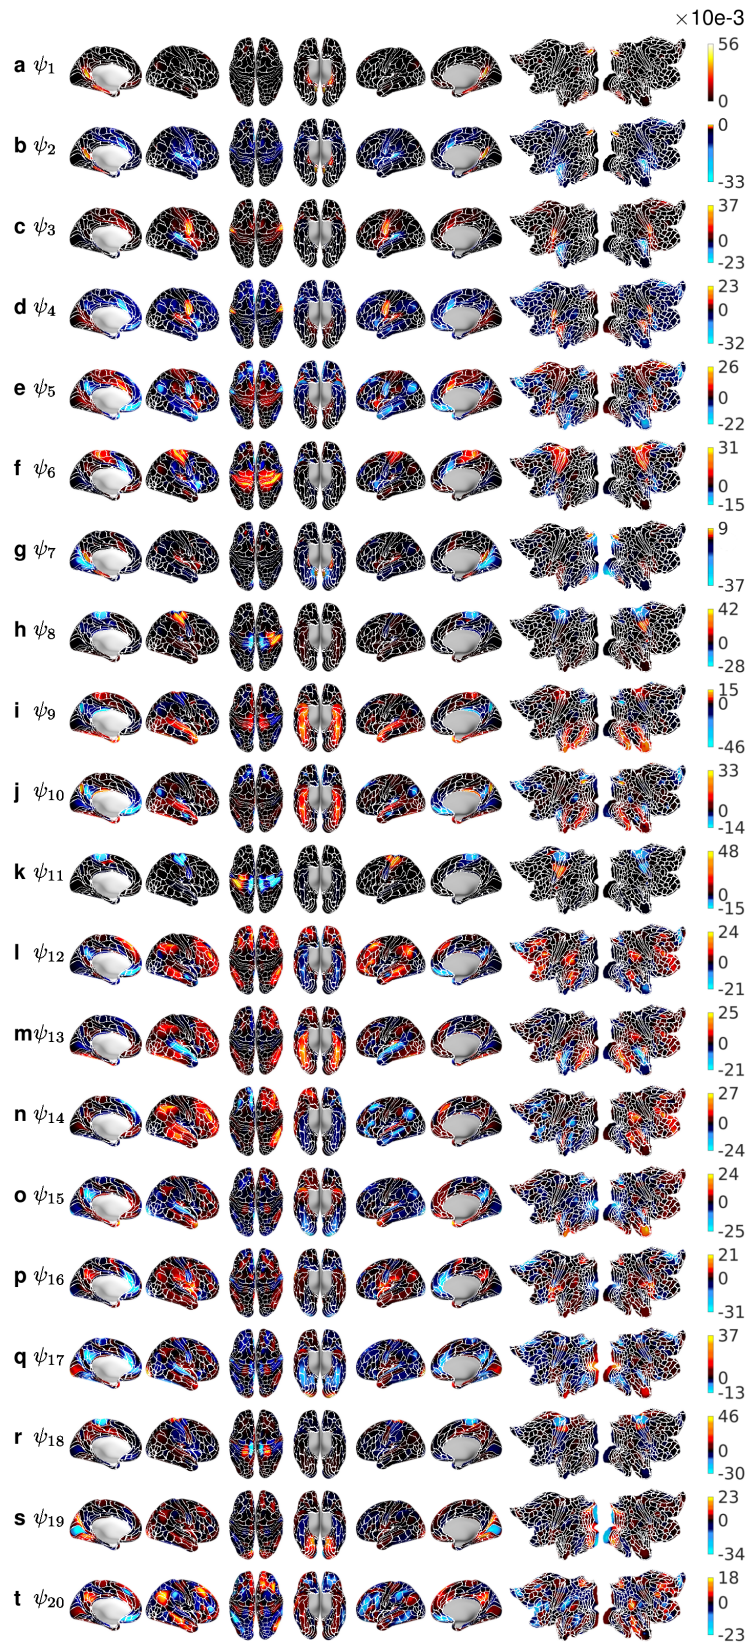

**Supplementary Figure 4.** First 20 eigenvectors derived from the adjacency matrix (referred to as  $\psi_1$ - $\psi_{20}$ ) with all borders defined in the HCP parcellation?

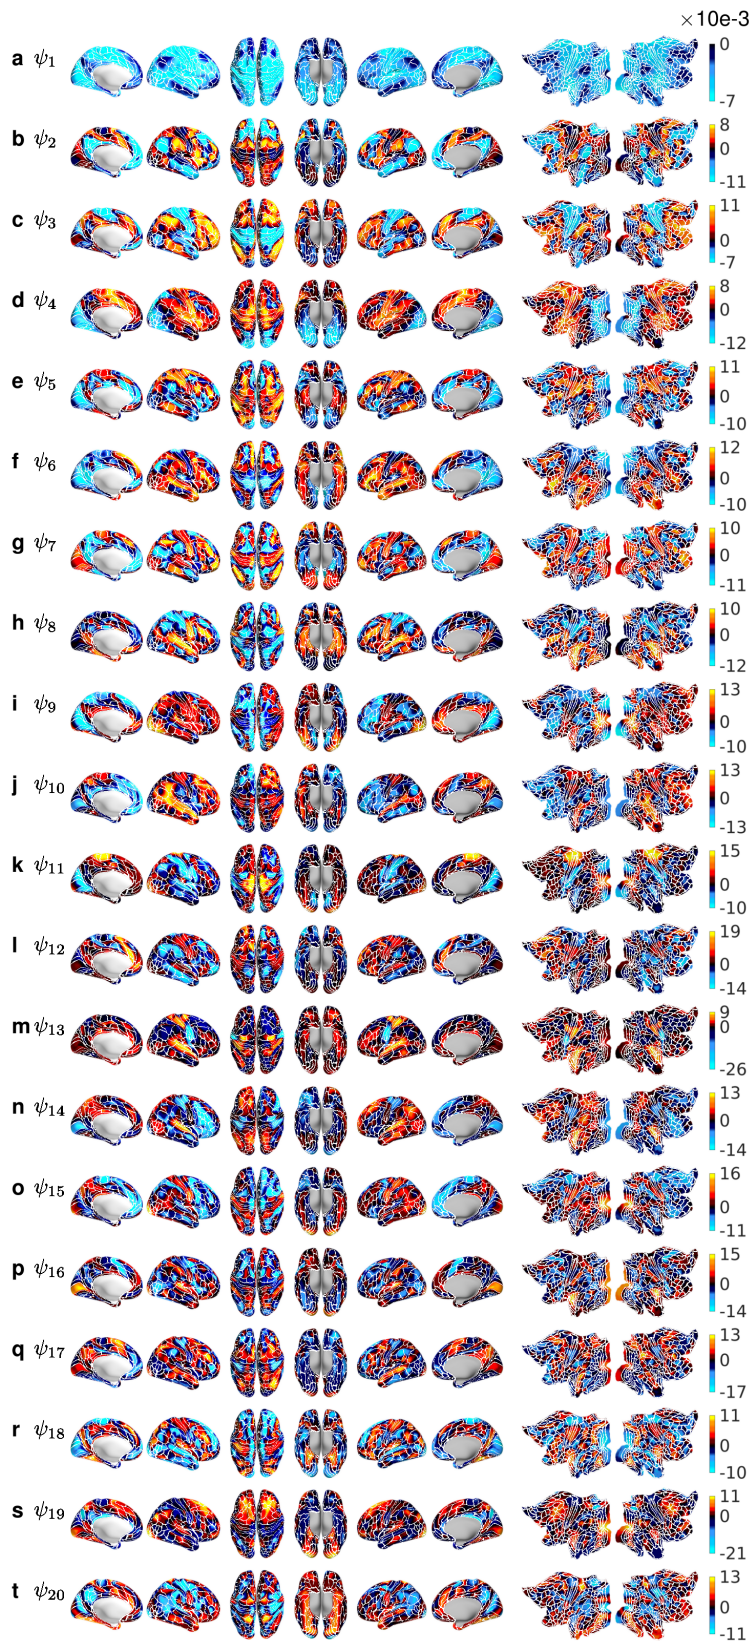

**Supplementary Figure 5.** First 20 eigenvectors derived from the dense functional connectivity matrix (referred to as  $\psi_1$ - $\psi_{20}$ ) with all borders defined in the HCP parcellation?

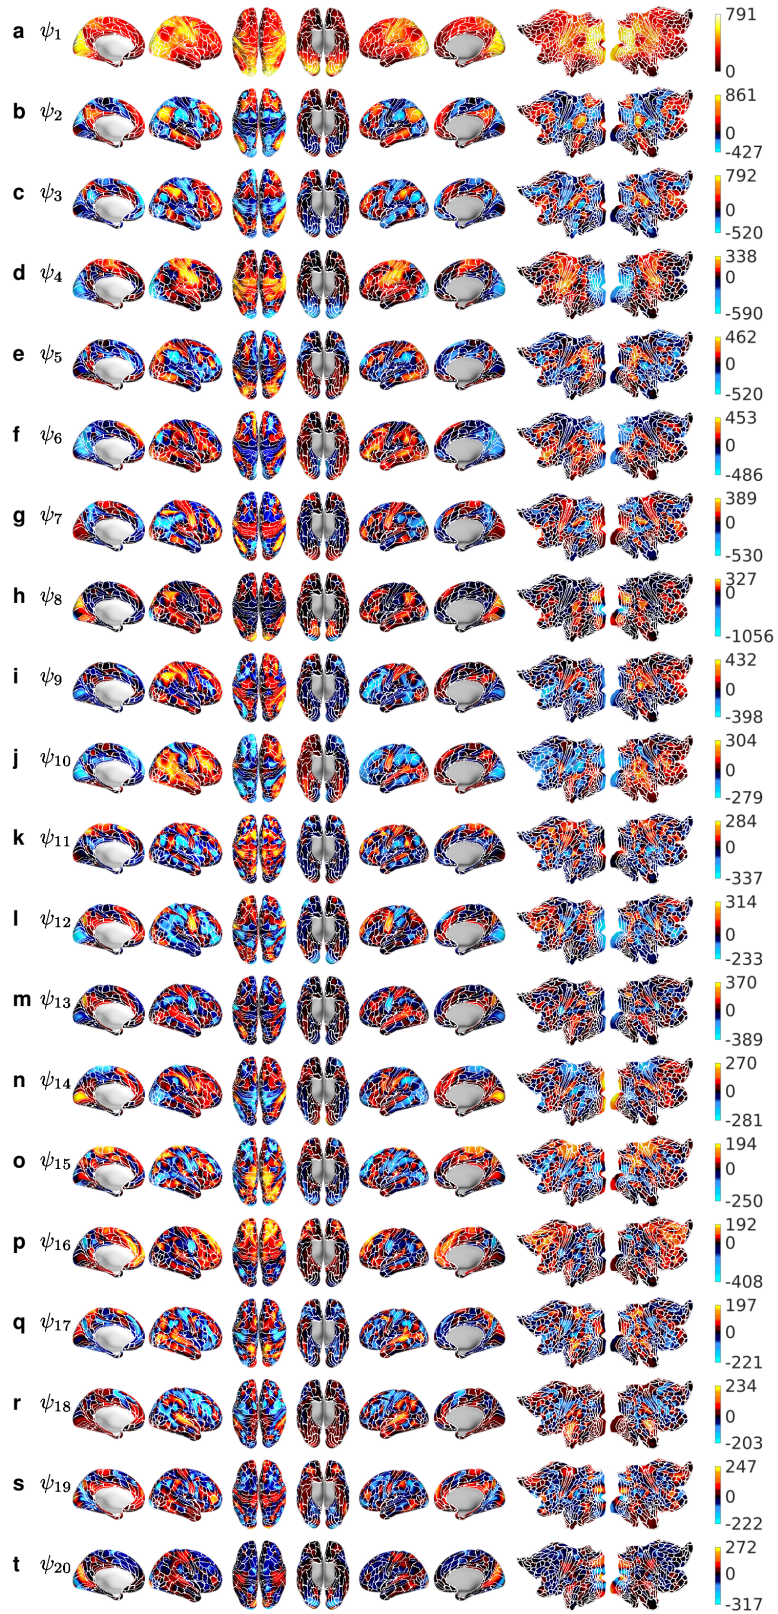

**Supplementary Figure 6.** First 20 principal components, i.e. eigenvectors of the covariance matrix, as provided by the HCP (referred to as  $\psi_1$ - $\psi_{20}$ ) with all borders defined in the HCP parcellation<sup>?</sup>.

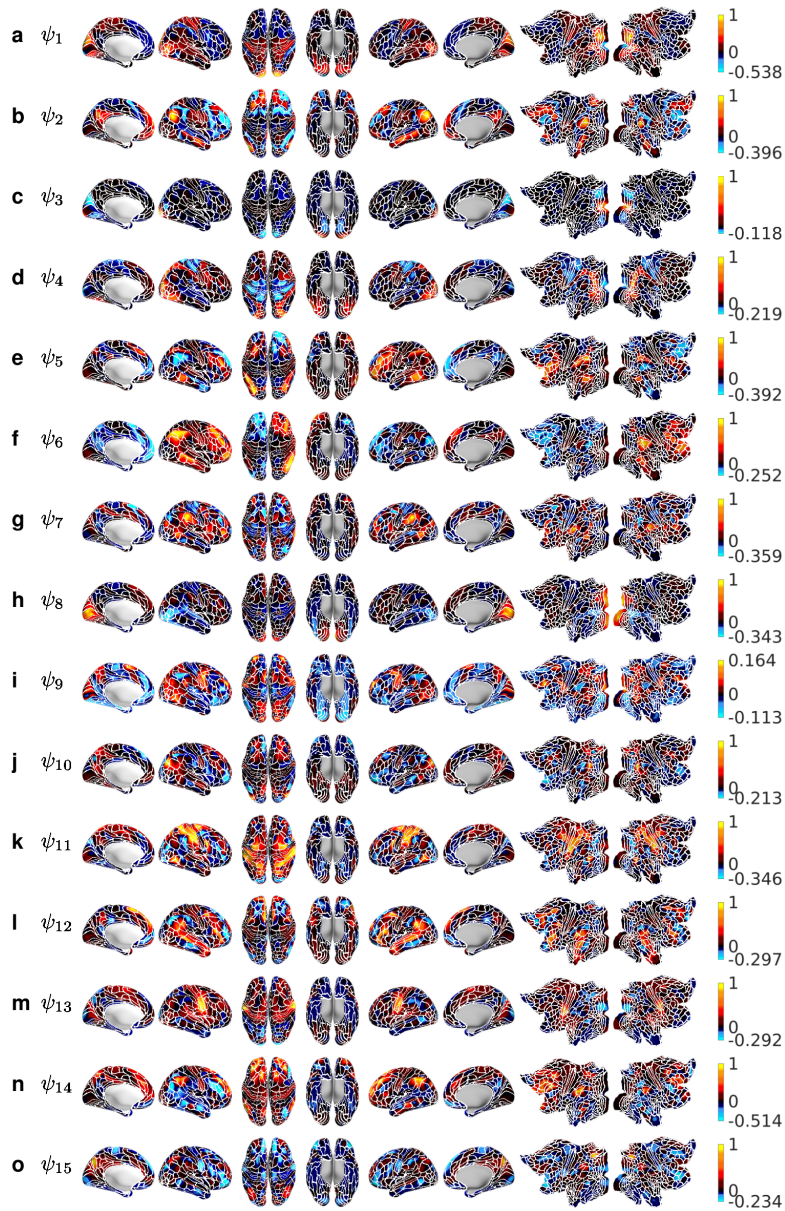

**Supplementary Figure 7.** 15 independent components as provided by the HCP (referred to as  $\psi_1$ - $\psi_{15}$ ) with all borders defined in the HCP parcellation<sup>2</sup>. In this case, the number of components was set to 15, i.e. the figure shows the complete set of ICs.

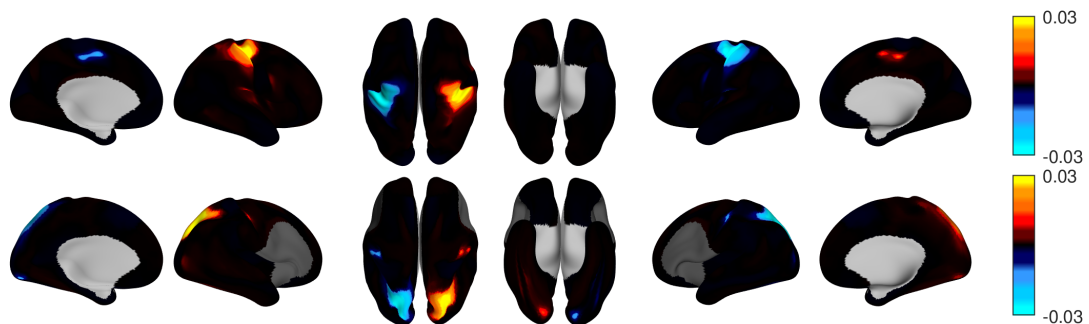

**Supplementary Figure 8.** One illustrative example for a rotated functional harmonic. Top: the original functional harmonic ( $\psi_{11}$ ). Bottom: A rotated version of the same surface map; smoothness and symmetry are preserved.

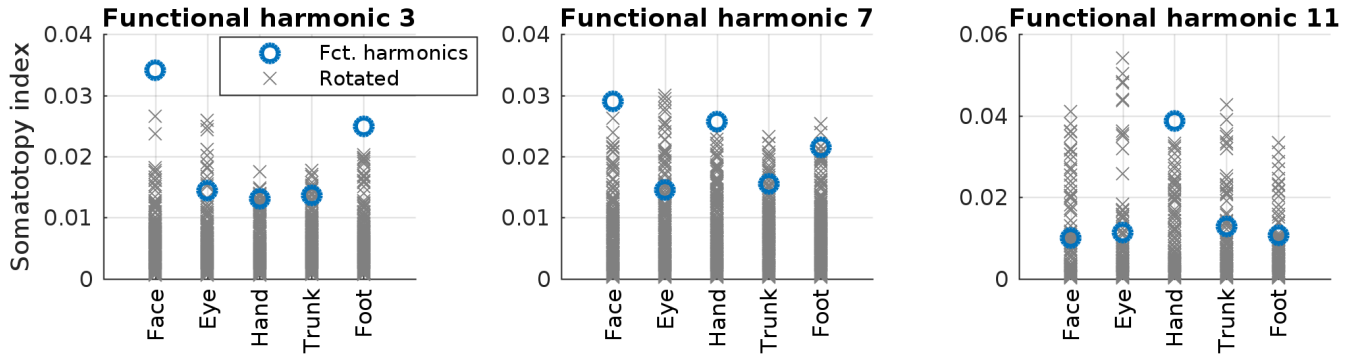

**Supplementary Figure 9.** "Somatotopy index" for functional harmonics 3, 7, and 11, and each of the somatotopic subregions (averaged across hemispheres), blue circles; grey crosses are computed from 300 sets of rotations of functional harmonics. This index will be high if the region is separated well from both the entire rest of the cortex and the other somatotopic regions (see Methods).

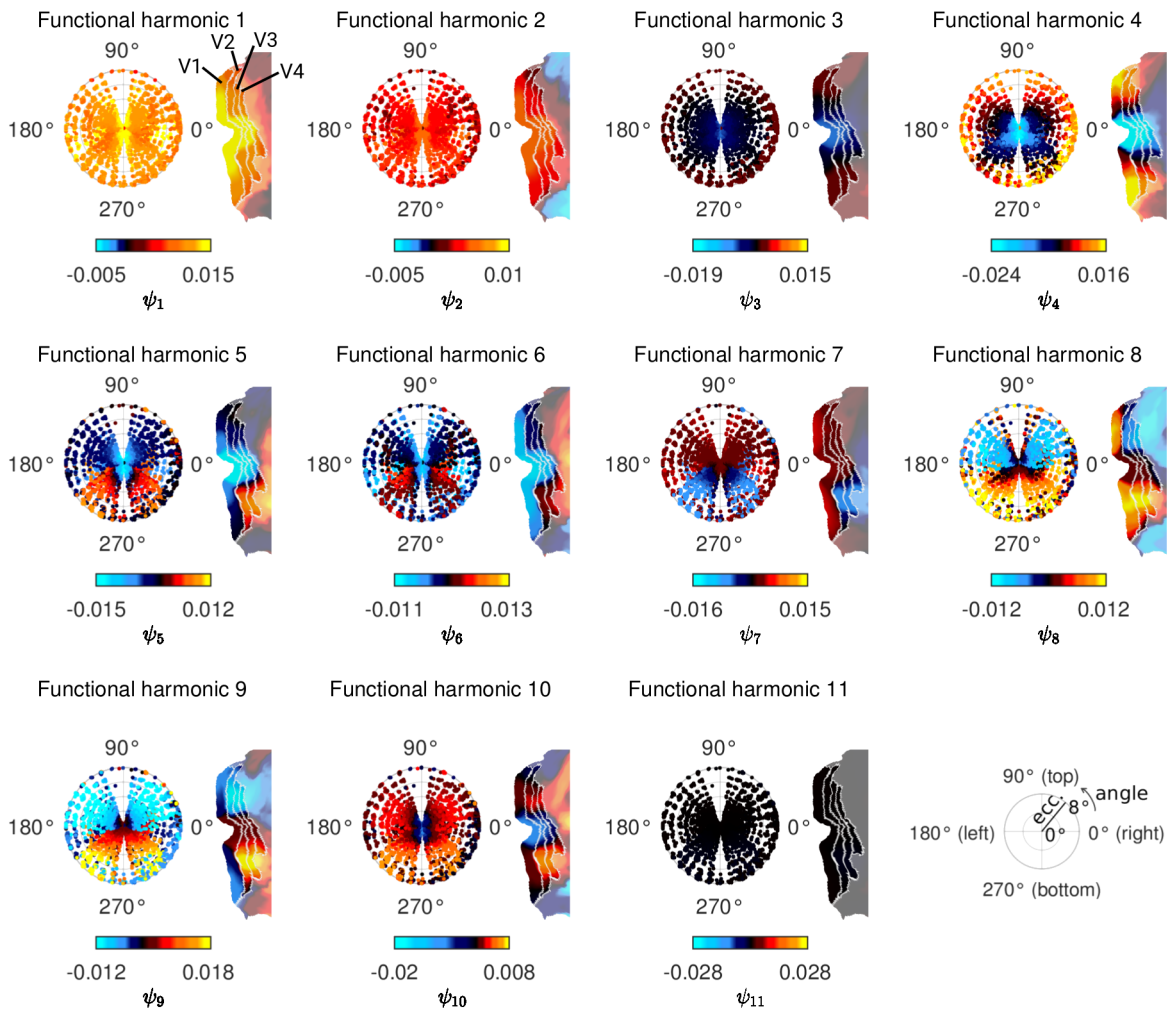

**Supplementary Figure 10.** All retinotopic mappings in V1-V4 found in the first 11 harmonics ( $\psi_1$ - $\psi_{11}$ ).



**a**

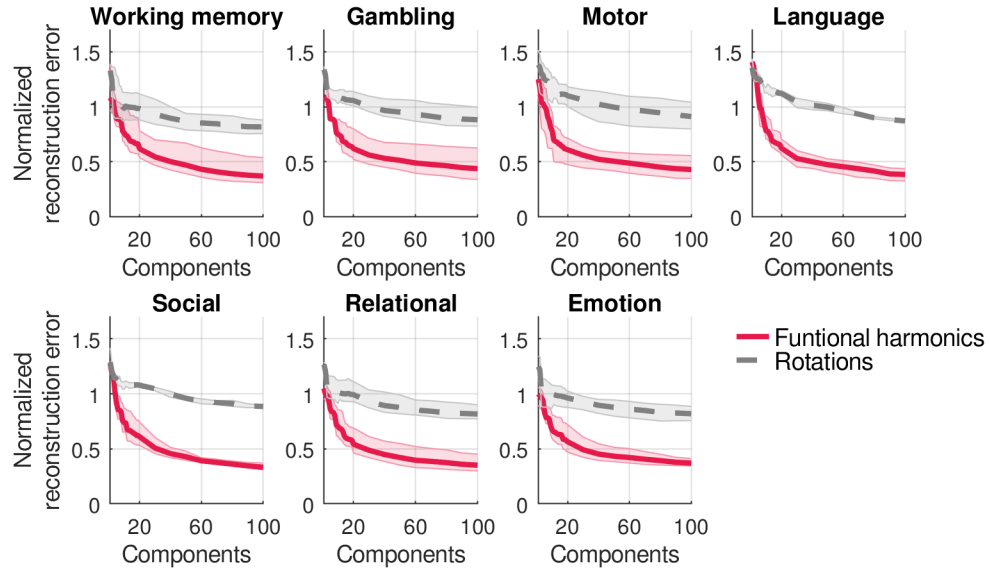

**b**

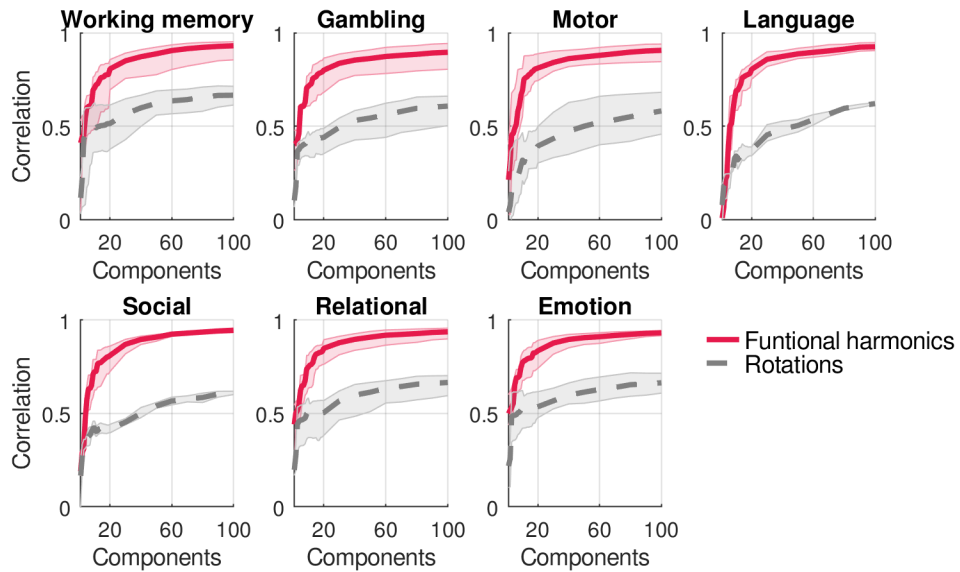

**Supplementary Figure 11.** Reconstruction performance of functional harmonics (solid lines) compared to their rotations (dashed lines). Shaded areas show the range (minimum and maximum) of reconstructions errors (a) and correlations (b) across all tasks in this group.

**a**

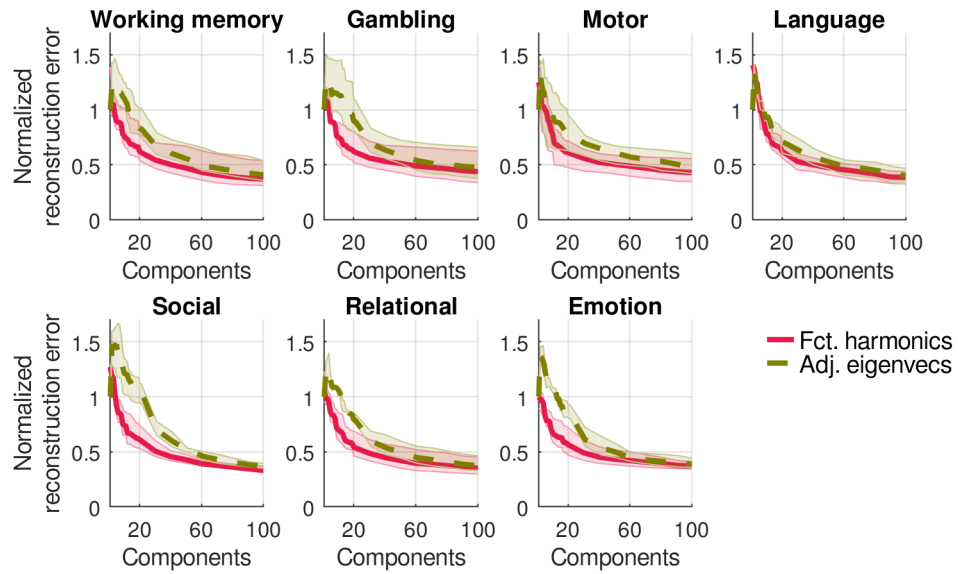

**b**

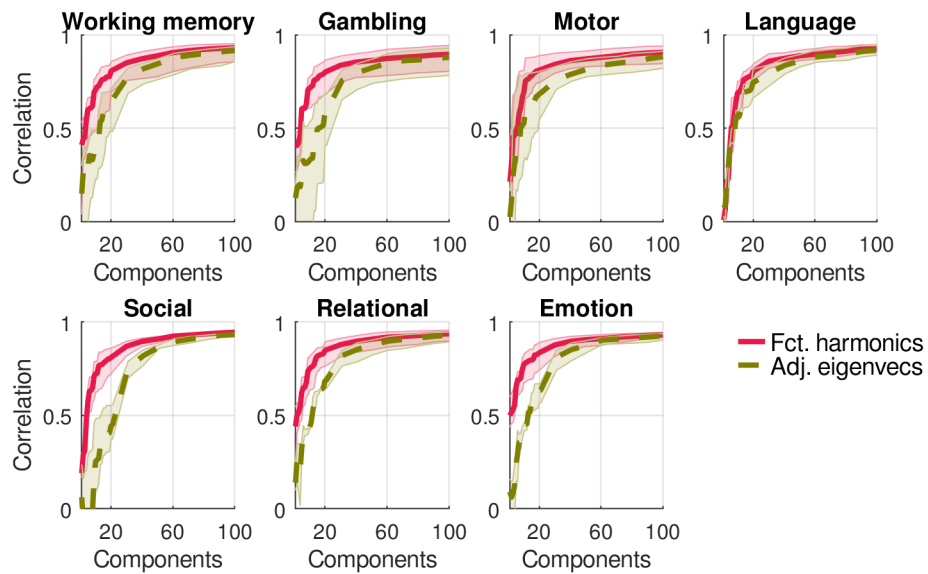

**Supplementary Figure 12.** Reconstruction performance of functional harmonics (solid lines) compared to eigenvectors of the adjacency matrix (dashed lines). Shaded areas show the range (minimum and maximum) of reconstructions errors (a) and correlations (b) across all tasks in this group.

**a**

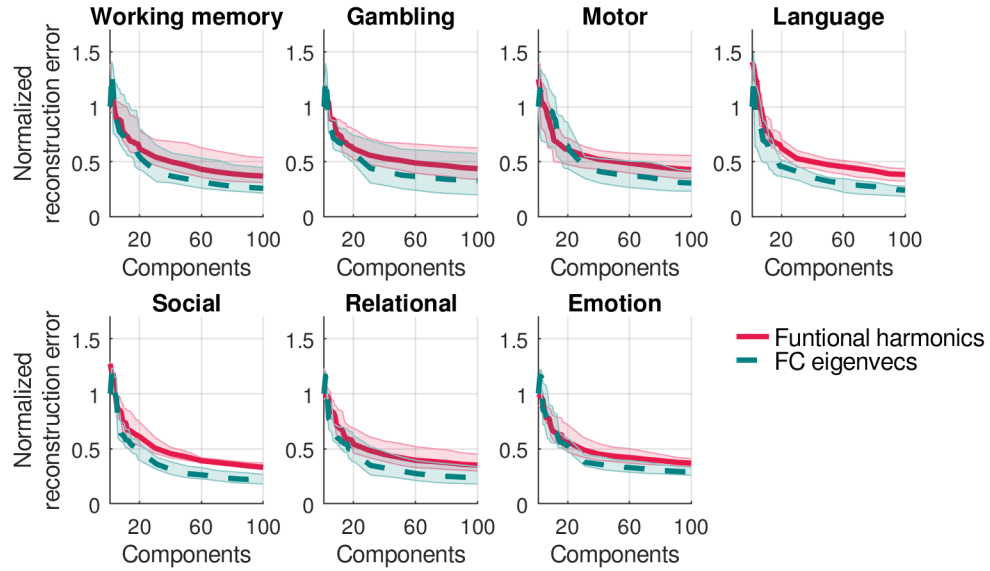

**b**

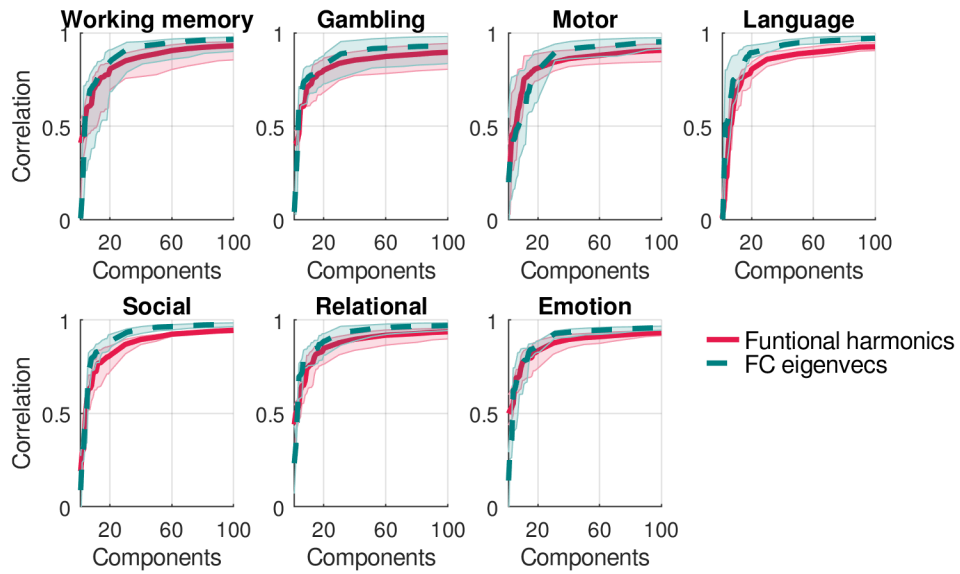

**Supplementary Figure 13.** Reconstruction performance of functional harmonics (solid lines) compared to eigenvectors of the dense functional connectivity matrix (dashed lines). Shaded areas show the range (minimum and maximum) of reconstructions errors (a) and correlations (b) across all tasks in this group.

**a**

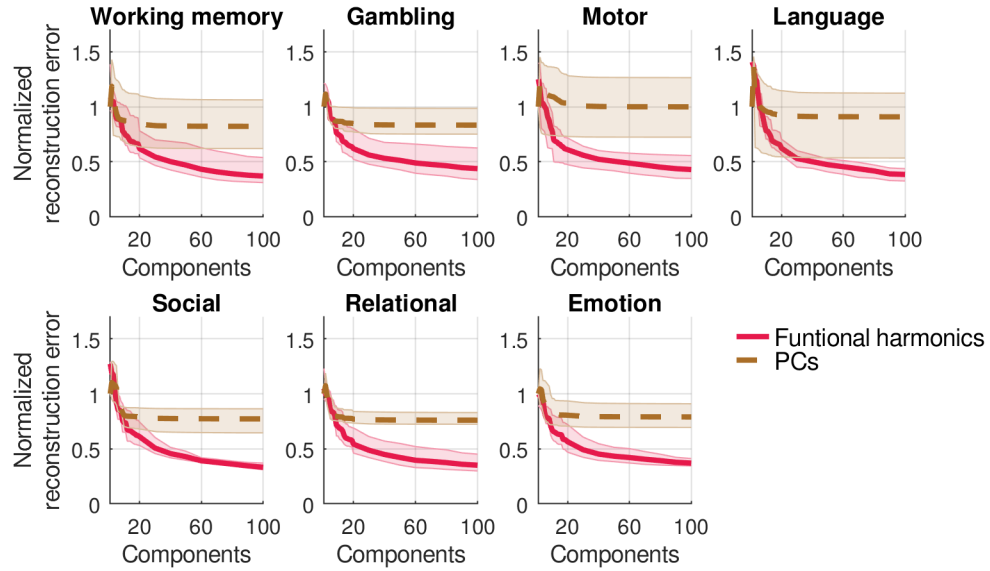

**b**

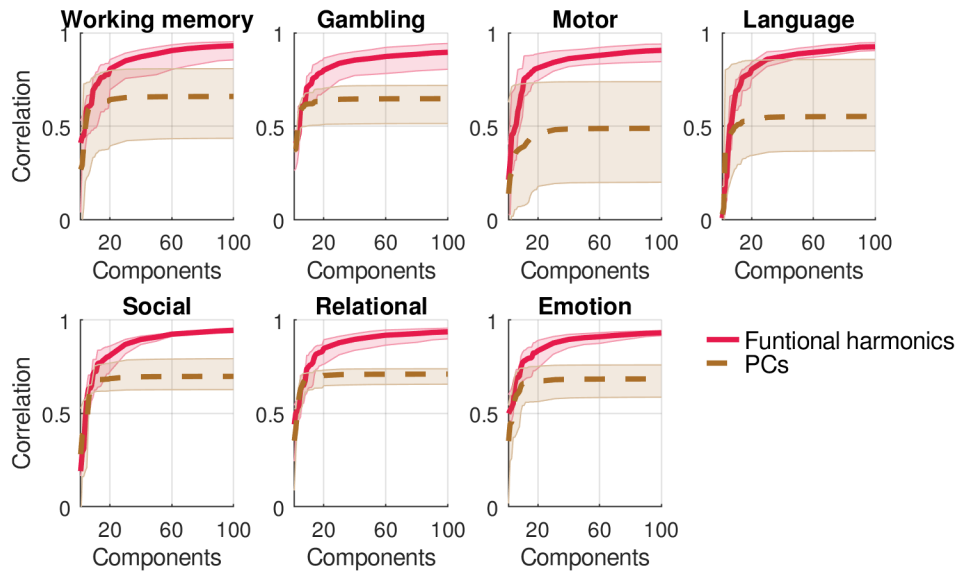

**Supplementary Figure 14.** Reconstruction performance of functional harmonics (solid lines) compared to principal components (dashed lines). Shaded areas show the range (minimum and maximum) of reconstructions errors (a) and correlations (b) across all tasks in this group.

**a**

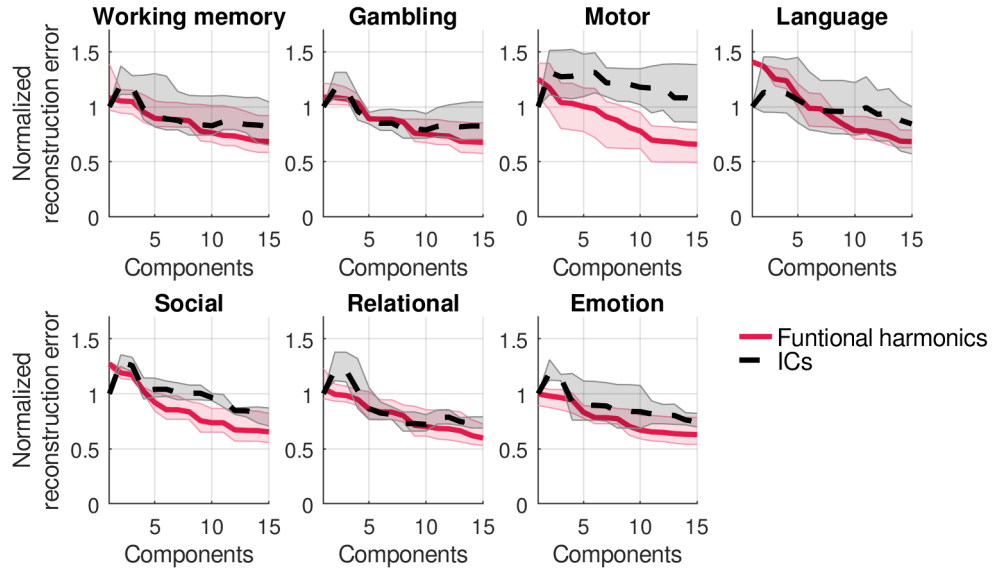

**b**

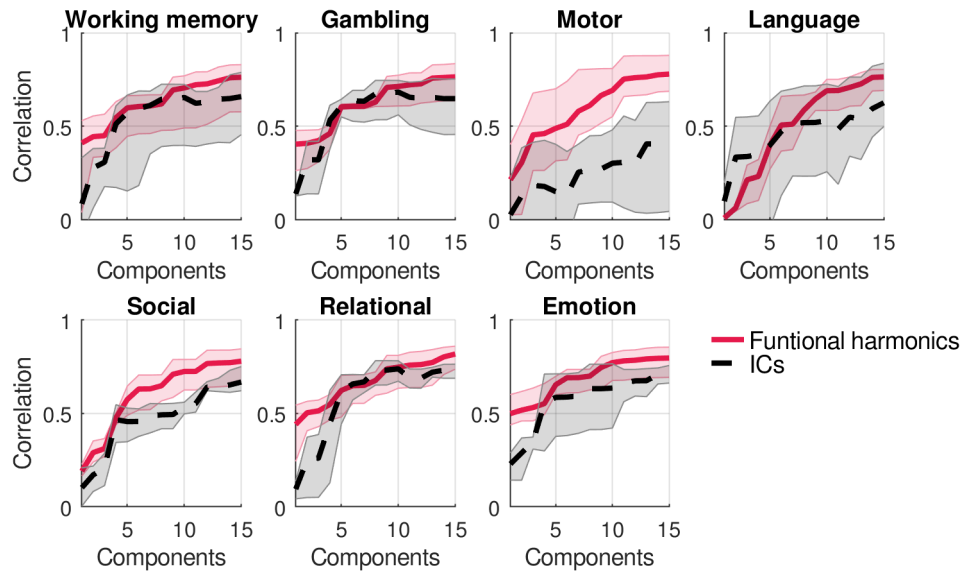

**Supplementary Figure 15.** Reconstruction performance of functional harmonics (solid lines) compared to independent components (dashed lines). Shaded areas show the range (minimum and maximum) of reconstructions errors (a) and correlations (b) across all tasks in this group.

Working memory: 2 back body

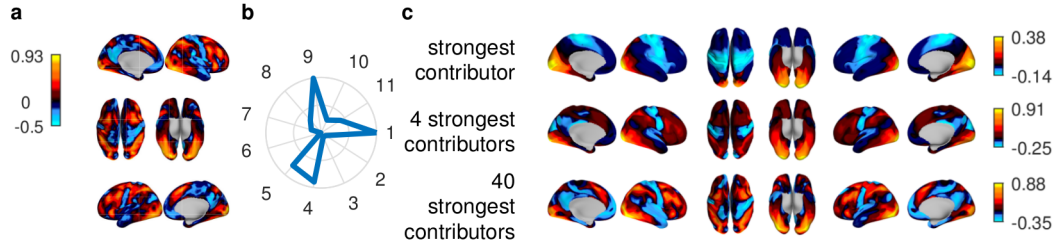

Working memory: 2 back face

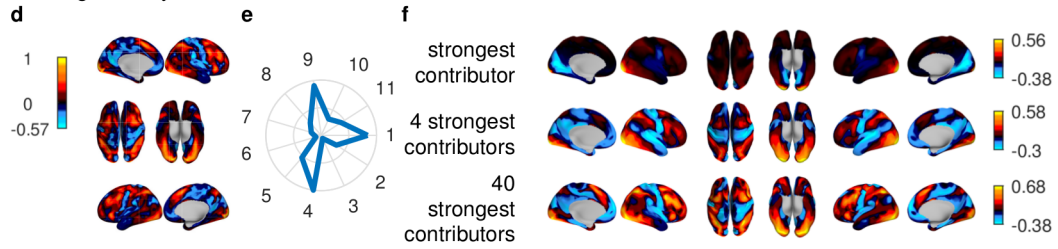

Working memory: 2 back place

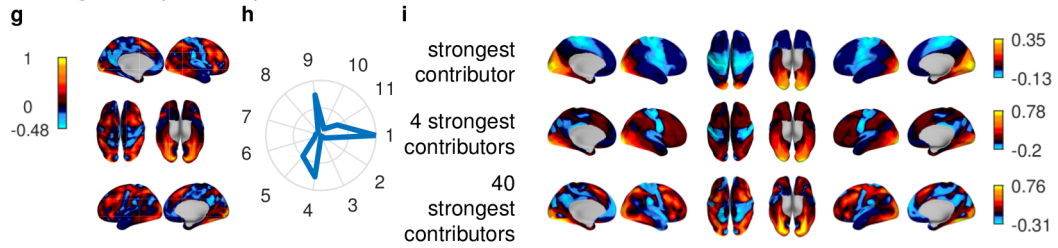

Working memory: 2 back tool

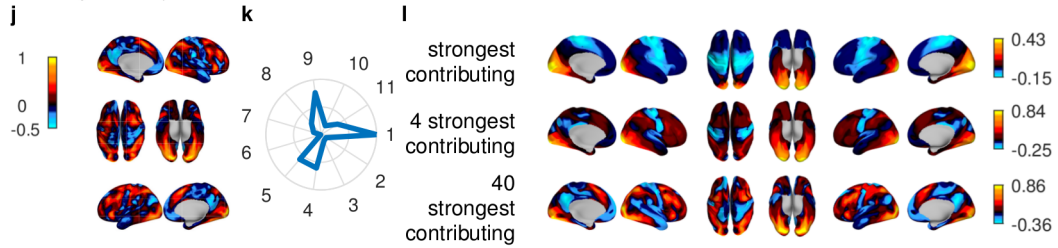

Working memory: 0 back body

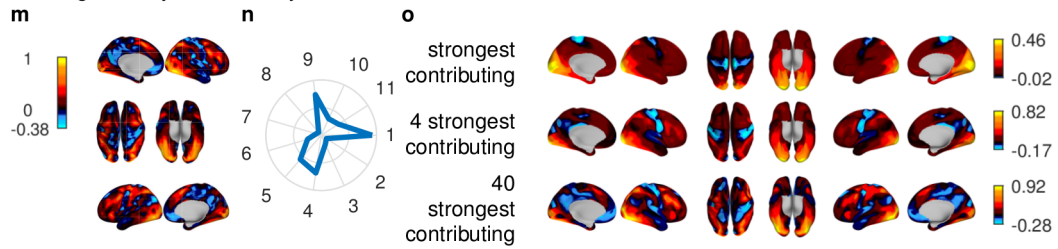

Working memory: 0 back face

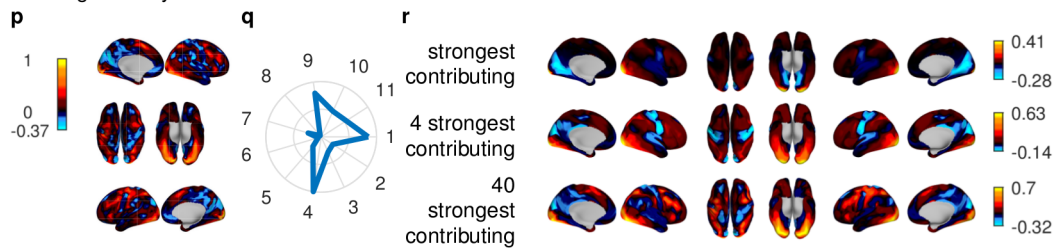

Supplementary Figure 16. Reconstructions for working memory task maps.

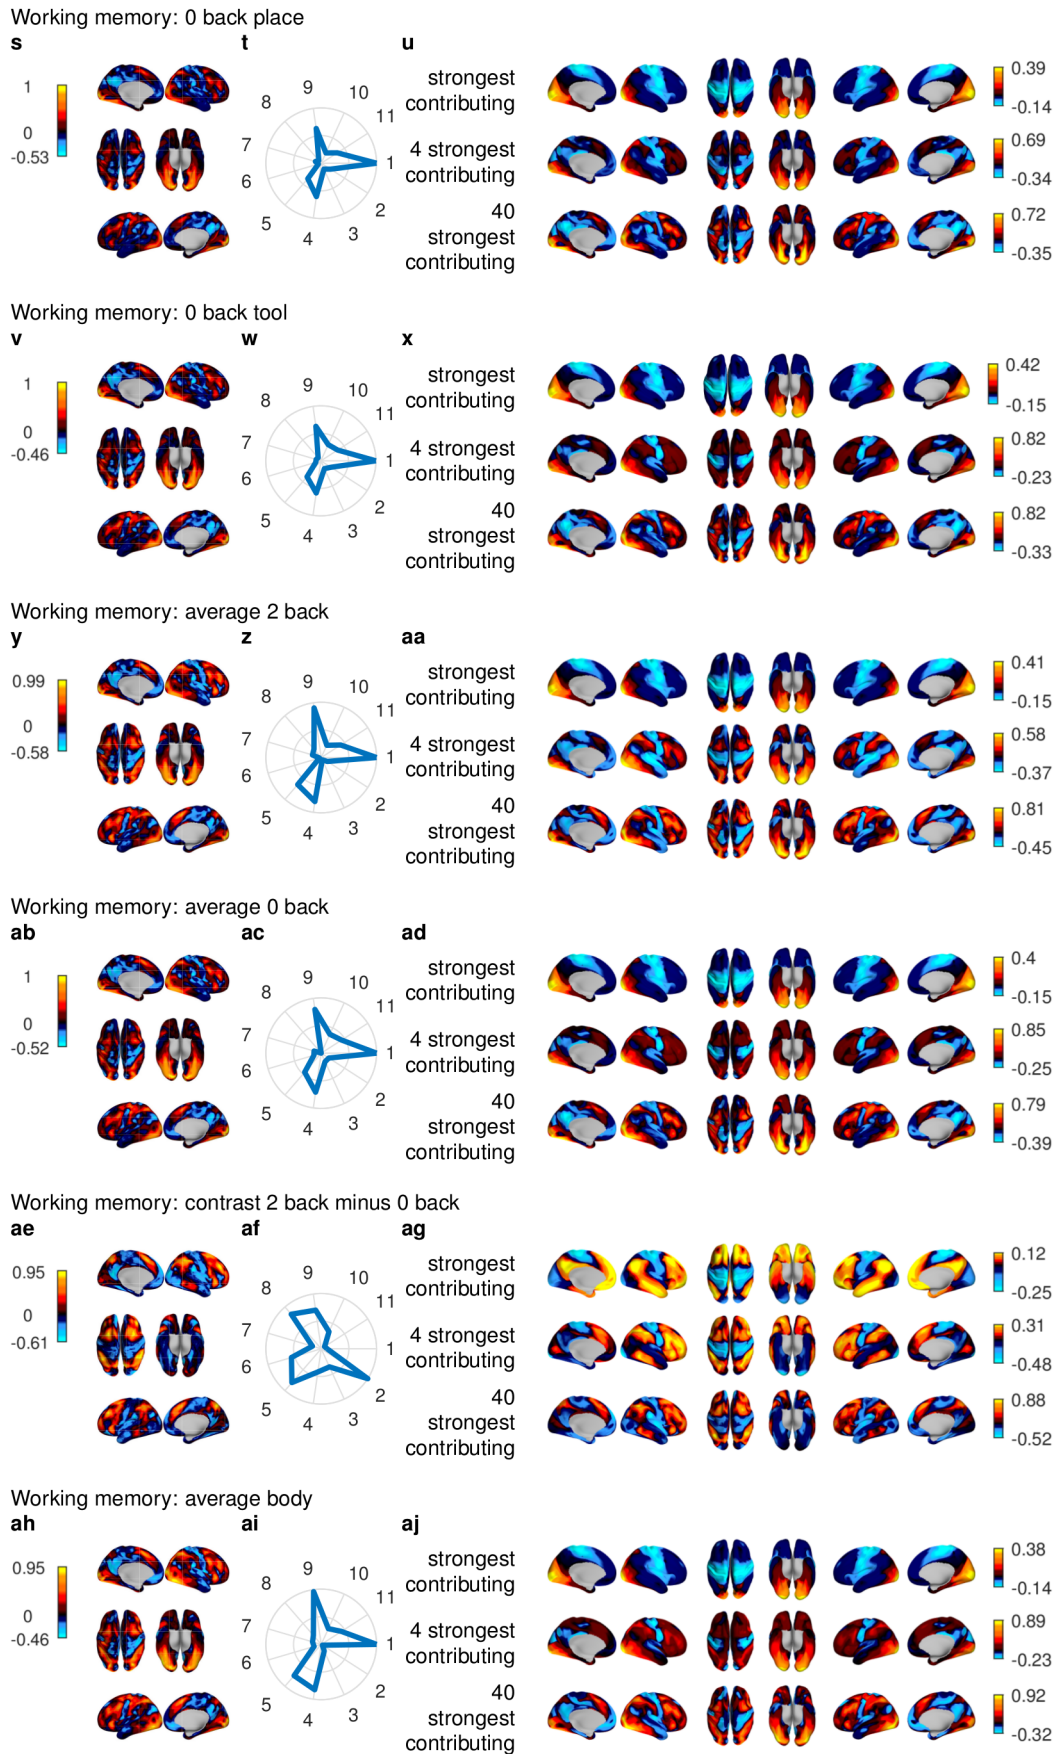

**Supplementary Figure 16.** (continued) Reconstructions for working memory task maps.

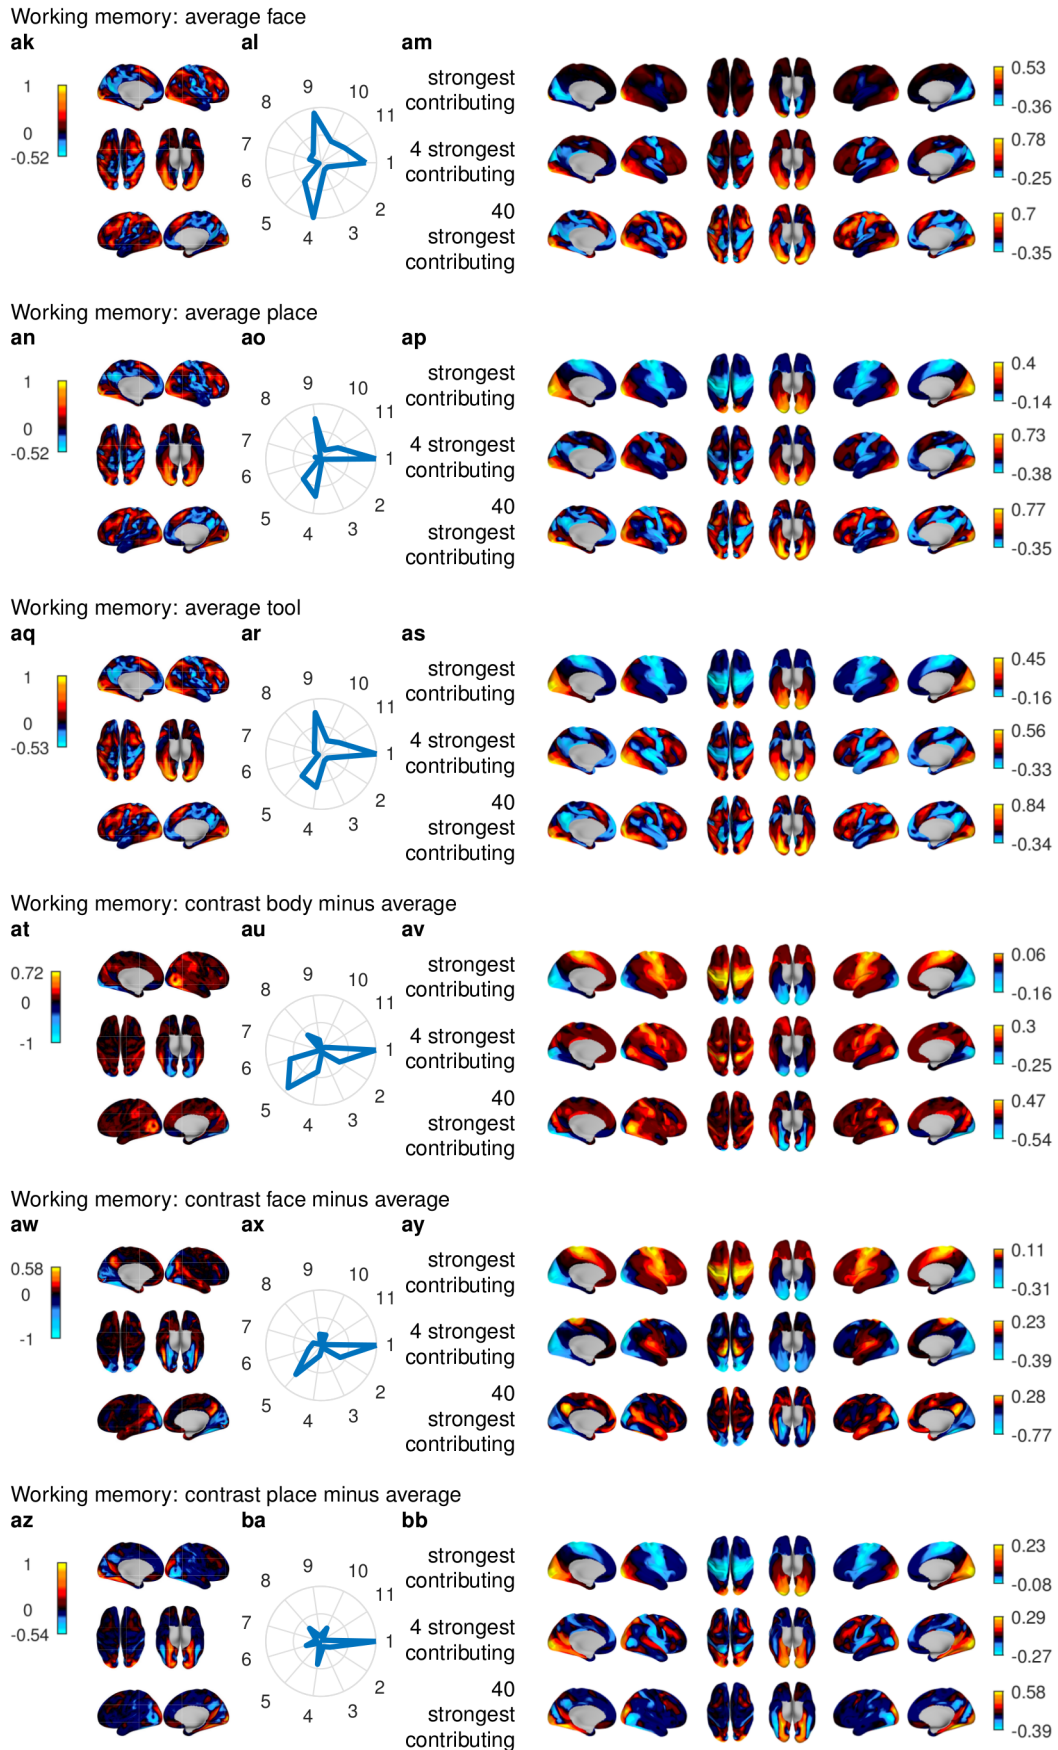

Supplementary Figure 16. (continued) Reconstructions for working memory task maps.



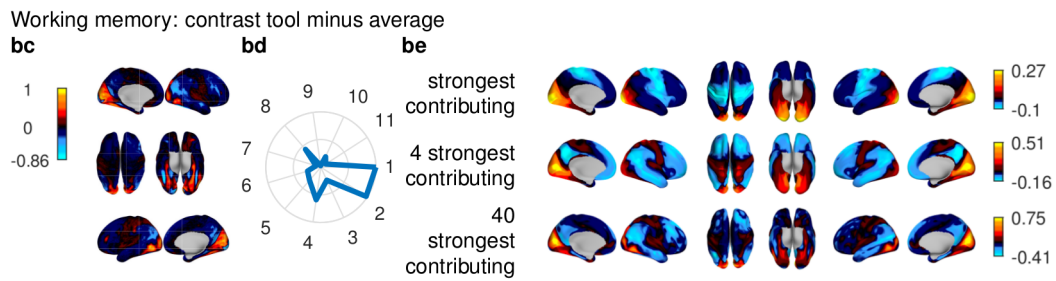

**Supplementary Figure 16.** (continued) Reconstructions for working memory task maps. The left column shows the original task map provided by the HCP<sup>2</sup>, see table 1 in Online Methods; the middle column, the normalized (over all 101 functional harmonics that were computed, i.e. the constant one and the first 100 non-constant ones) absolute value of the coefficient which measures the contribution of the first non-constant harmonics; the right column shows the reconstructions of the task maps using the indicated number of strongest contributing functional harmonics.

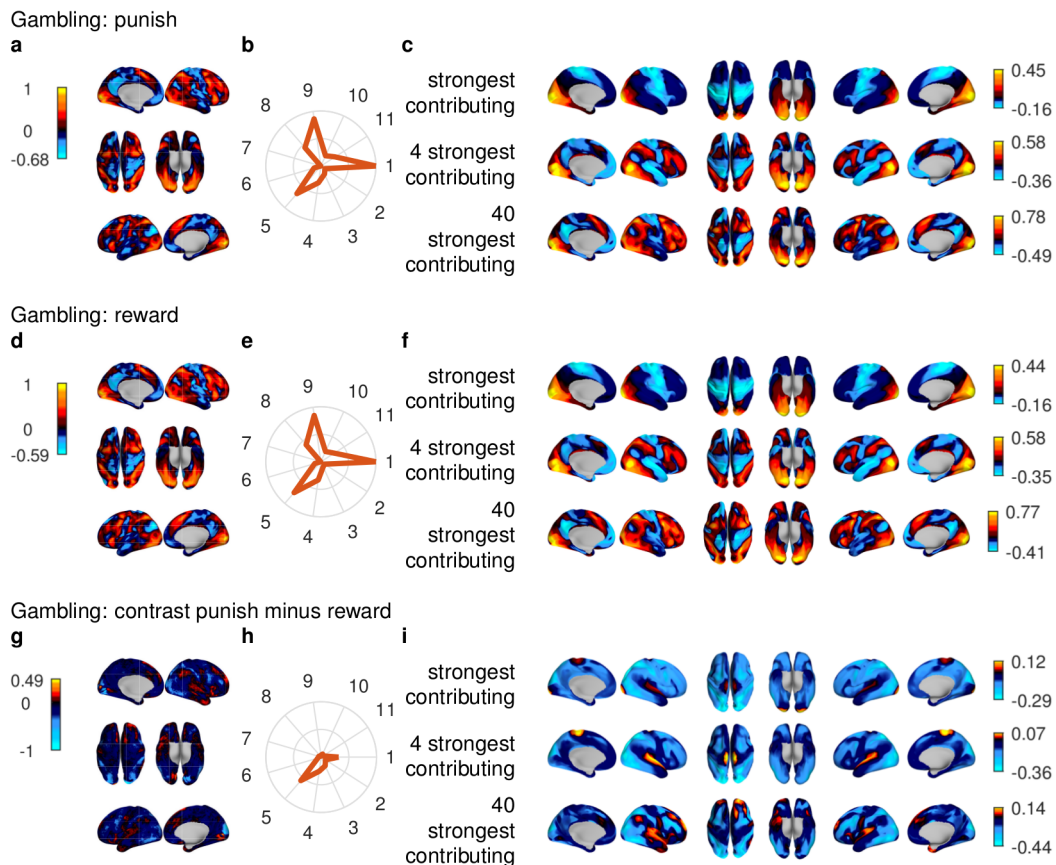

**Supplementary Figure 17.** Reconstructions for gambling task maps. The left column shows the original task map provided by the HCP<sup>2</sup>, see table 1 in Online Methods; the middle column, the normalized (over all 101 functional harmonics that were computed, i.e. the constant one and the first 100 non-constant ones) absolute value of the coefficient which measures the contribution of the first non-constant harmonics; the right column shows the reconstructions of the task maps using the indicated number of strongest contributing functional harmonics.

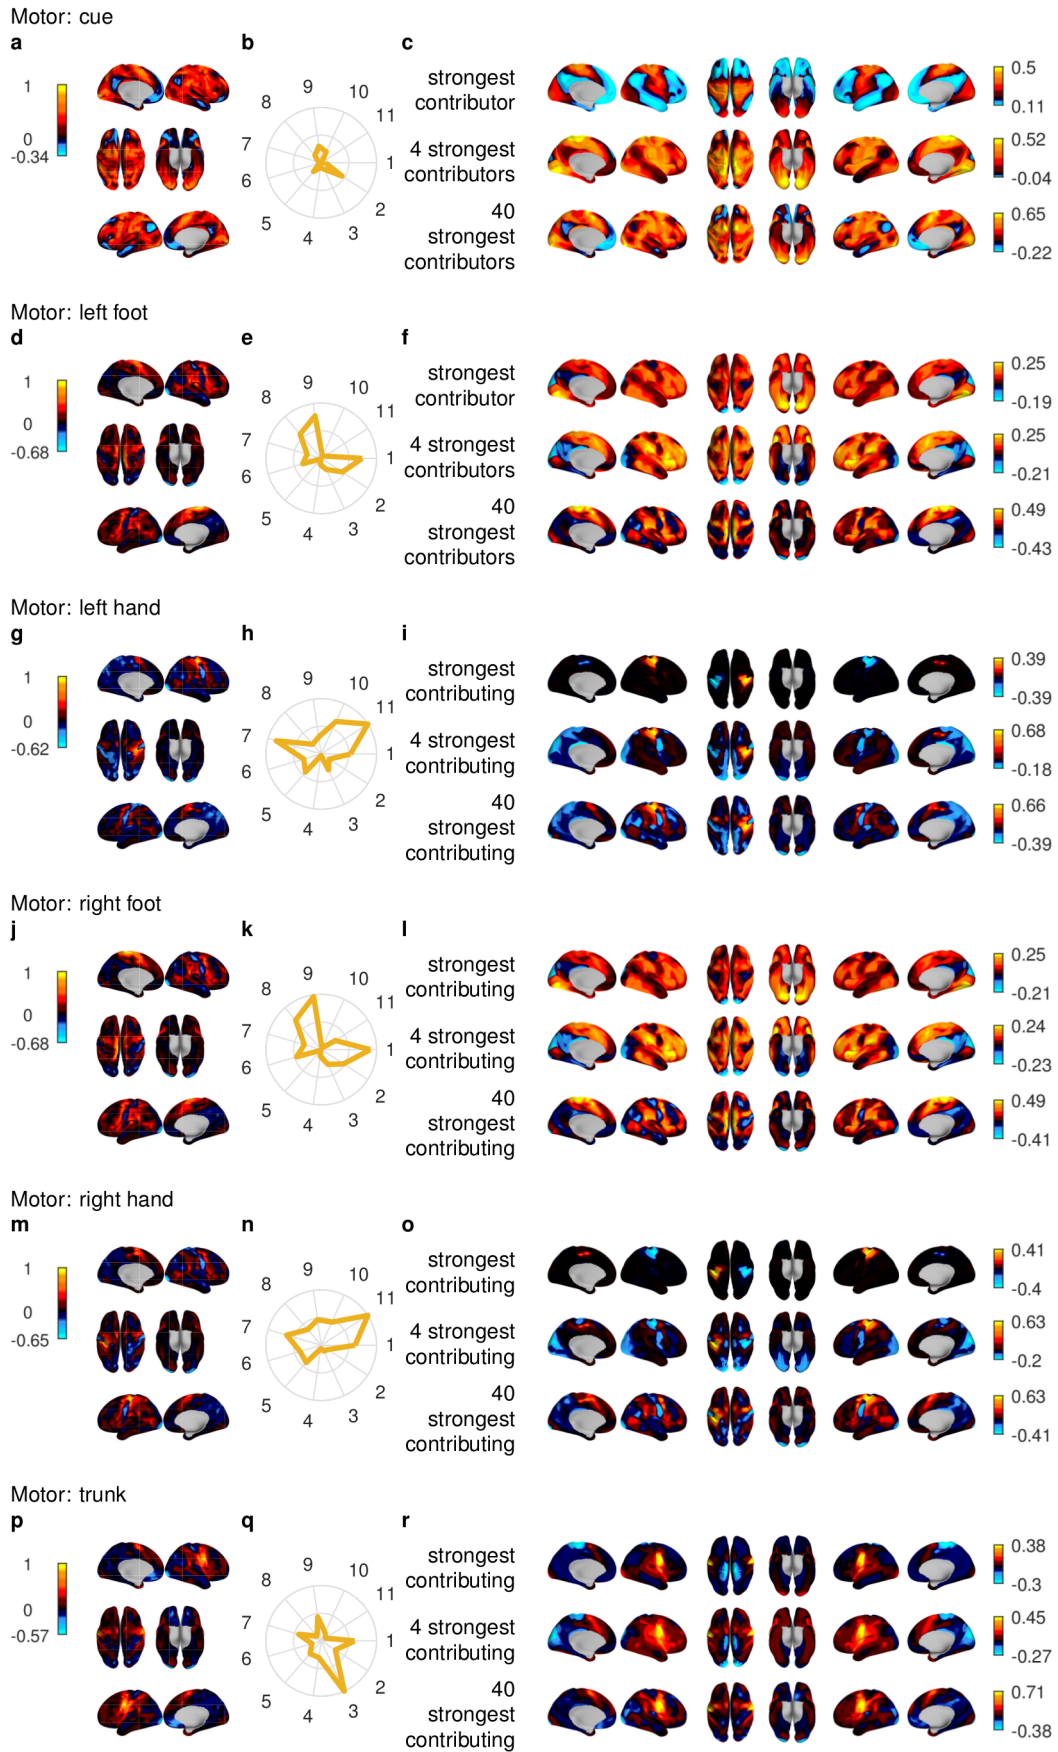

Supplementary Figure 18. Reconstructions for motor task maps.

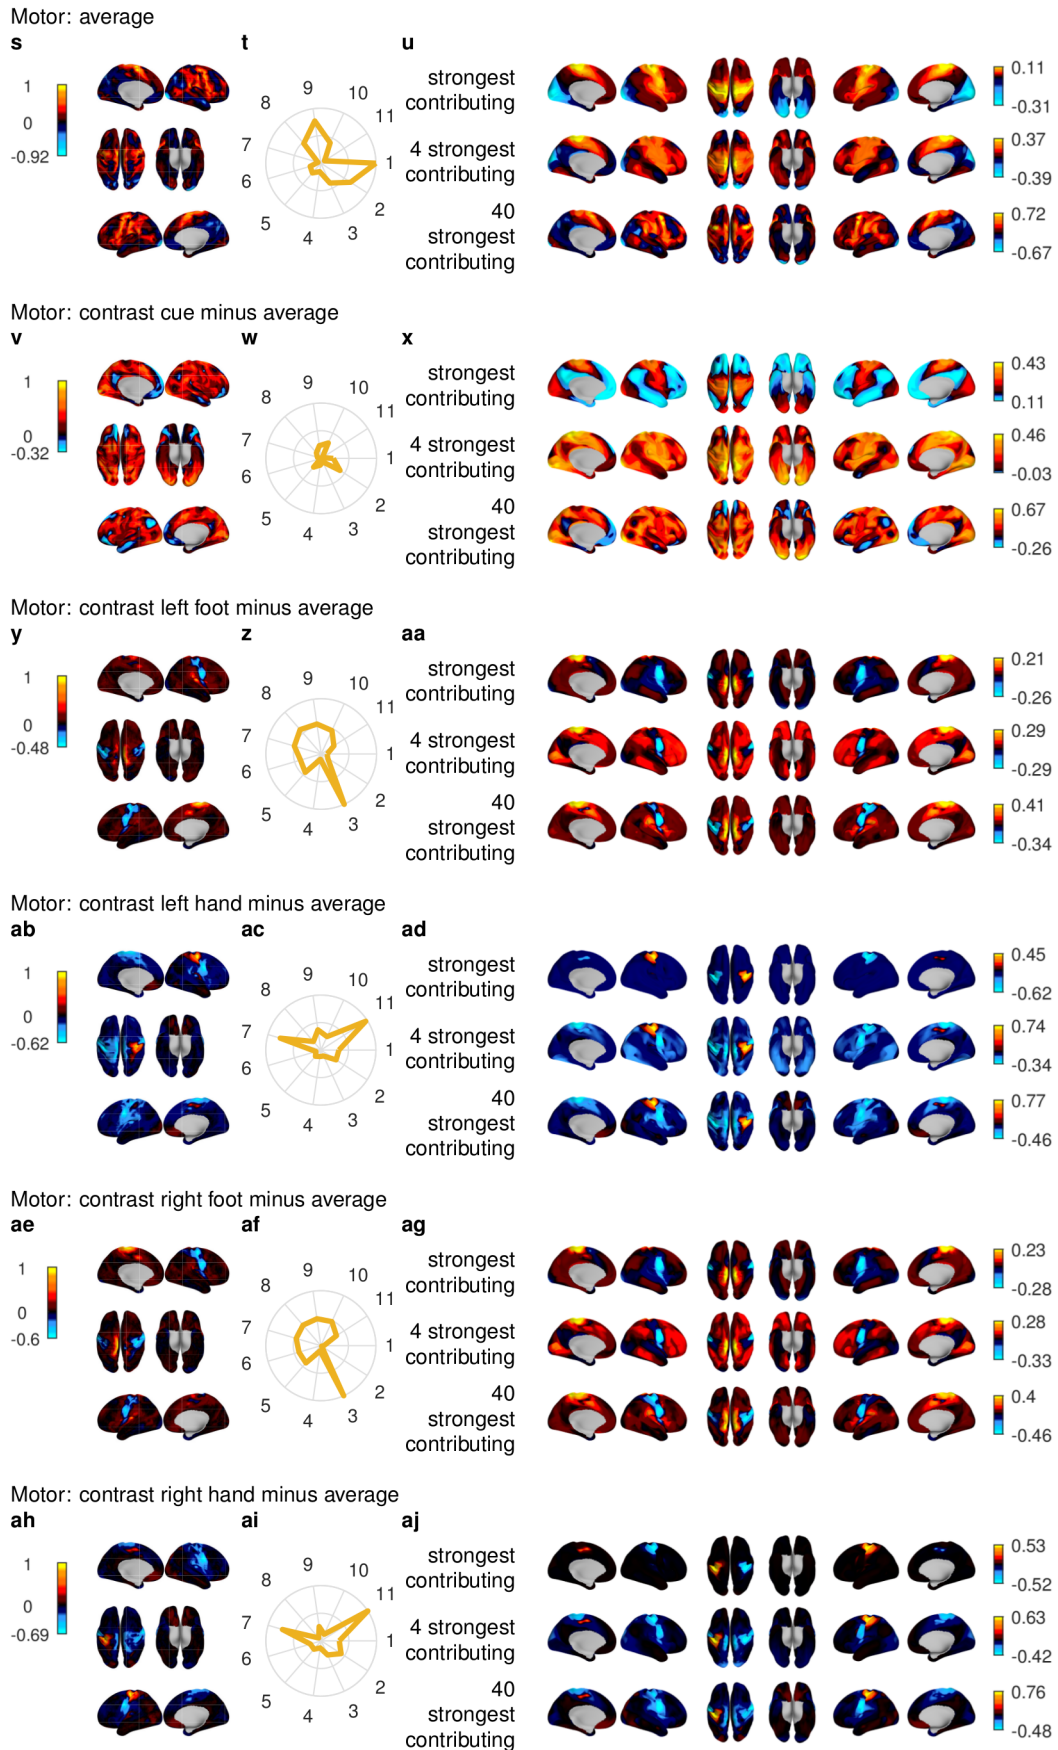

**Supplementary Figure 18.** (continued) Reconstructions for motor task maps.

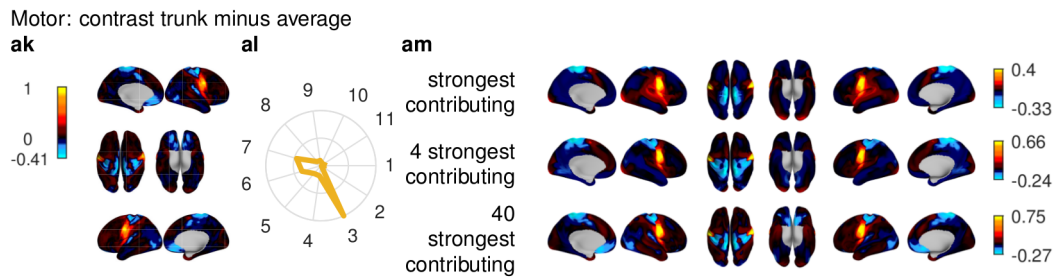

**Supplementary Figure 18.** (continued) Reconstructions for motor task maps. The left column shows the original task map provided by the HCP<sup>2</sup>, see table 1 in Online Methods; the middle column, the normalized (over all 101 functional harmonics that were computed, i.e. the constant one and the first 100 non-constant ones) absolute value of the coefficient which measures the contribution of the first non-constant harmonics; the right column shows the reconstructions of the task maps using the indicated number of strongest contributing functional harmonics.

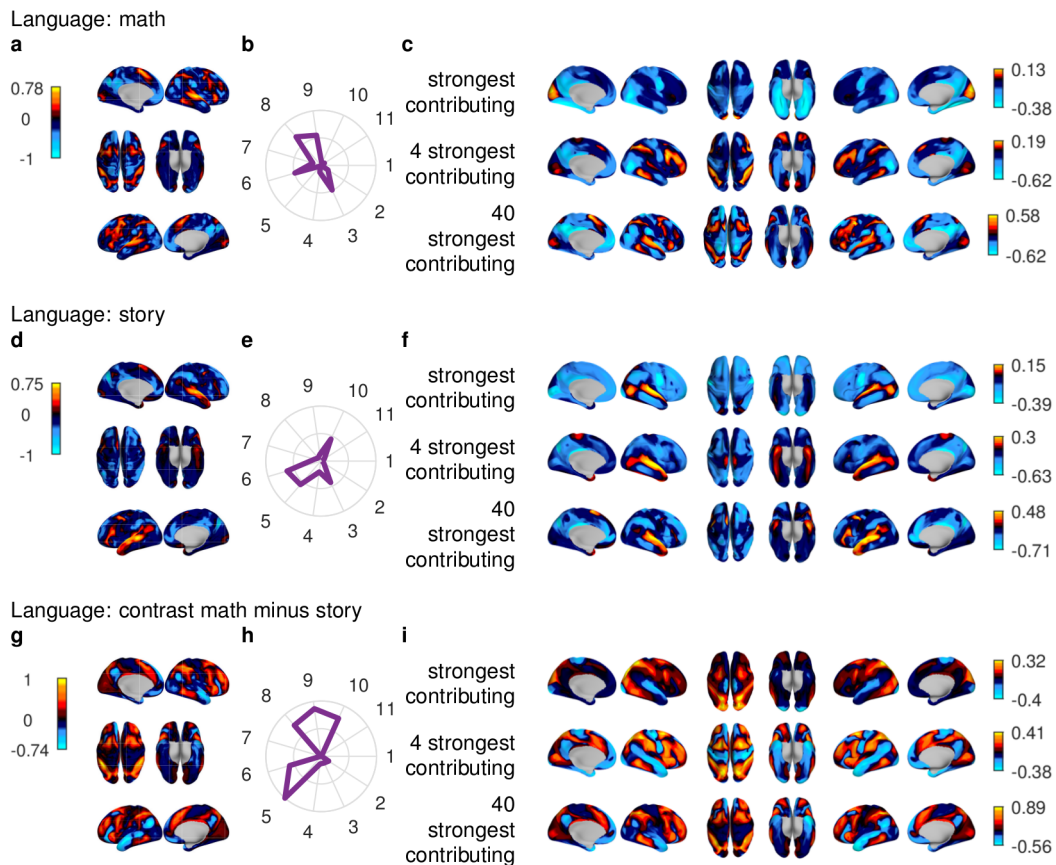

**Supplementary Figure 19.** Reconstructions for language task maps. The left column shows the original task map provided by the HCP<sup>2</sup>, see table 1 in Online Methods; the middle column, the normalized (over all 101 functional harmonics that were computed, i.e. the constant one and the first 100 non-constant ones) absolute value of the coefficient which measures the contribution of the first non-constant harmonics; the right column shows the reconstructions of the task maps using the indicated number of strongest contributing functional harmonics.

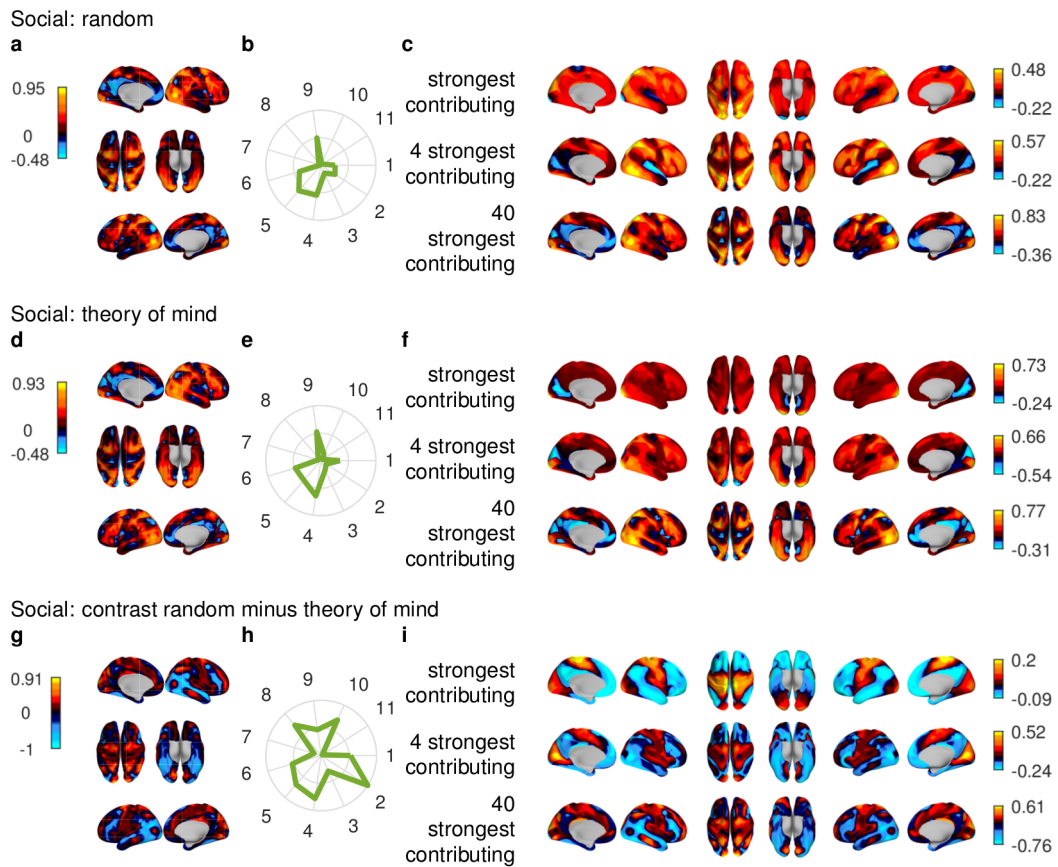

**Supplementary Figure 20.** Reconstructions for social task maps. The left column shows the original task map provided by the HCP<sup>2</sup>, see table 1 in Online Methods; the middle column, the normalized (over all 101 functional harmonics that were computed, i.e. the constant one and the first 100 non-constant ones) absolute value of the coefficient which measures the contribution of the first non-constant harmonics; the right column shows the reconstructions of the task maps using the indicated number of strongest contributing functional harmonics.

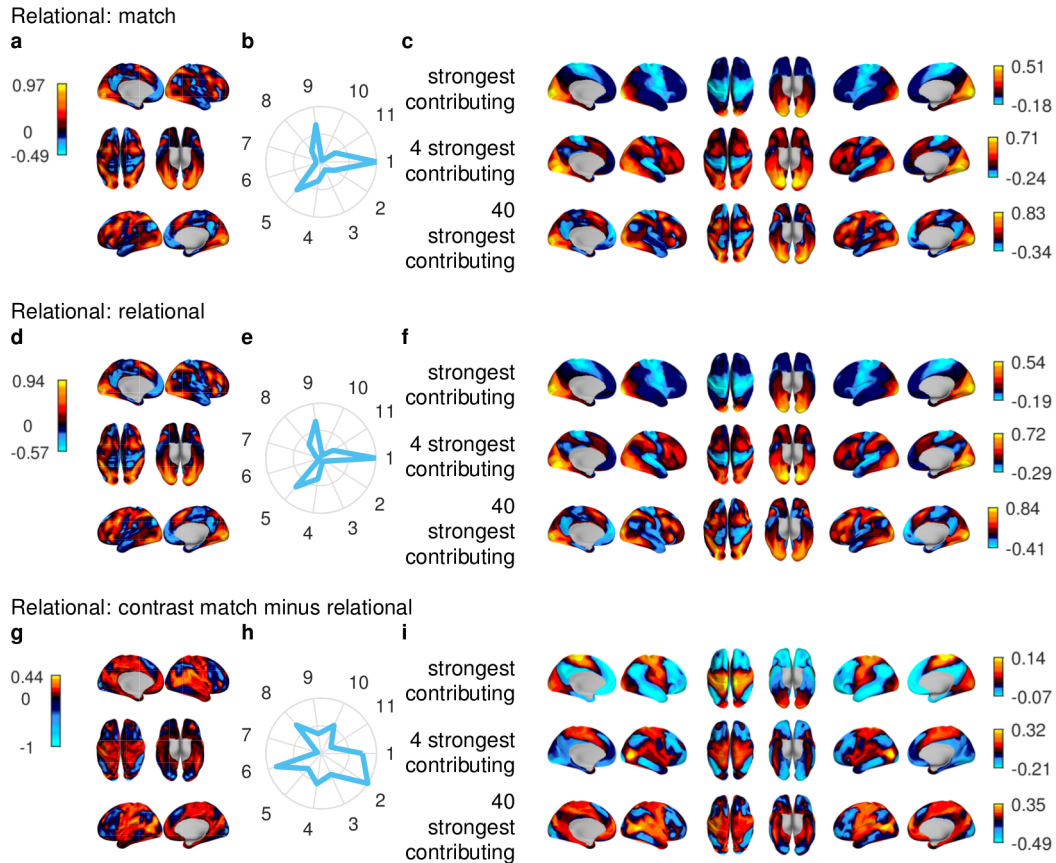

**Supplementary Figure 21.** Reconstructions for relational task maps. The left column shows the original task map provided by the HCP<sup>2</sup>, see table 1 in Online Methods; the middle column, the normalized (over all 101 functional harmonics that were computed, i.e. the constant one and the first 100 non-constant ones) absolute value of the coefficient which measures the contribution of the first non-constant harmonics; the right column shows the reconstructions of the task maps using the indicated number of strongest contributing functional harmonics.

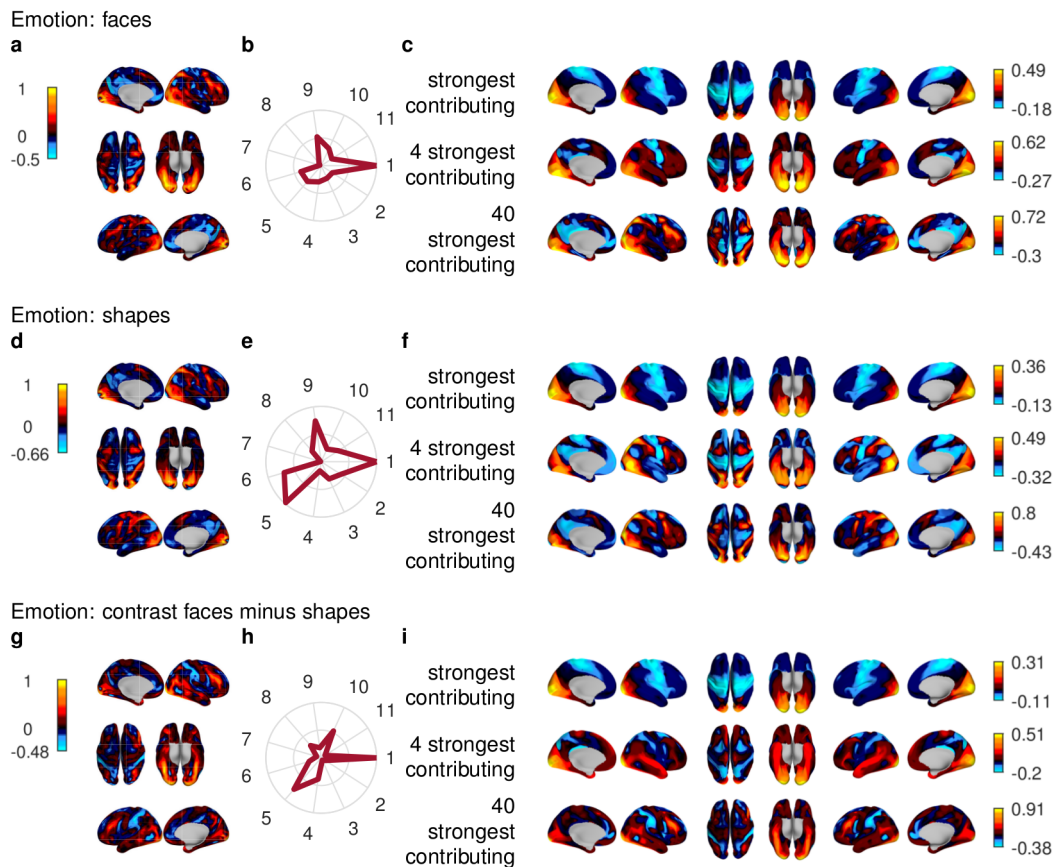

**Supplementary Figure 22.** Reconstructions for emotion task maps. The left column shows the original task map provided by the HCP<sup>2</sup>, see table 1 in Online Methods; the middle column, the normalized (over all 101 functional harmonics that were computed, i.e. the constant one and the first 100 non-constant ones) absolute value of the coefficient which measures the contribution of the first non-constant harmonics; the right column shows the reconstructions of the task maps using the indicated number of strongest contributing functional harmonics.
